# Supplementary material
Source: PubMed Central journal article supplement (PMC7171677)

ACS Infectious Disease – Supplementary Information

Parallel Hit Progression Strategy Identifies Improved Small Molecule Inhibitors of the Malaria Purine Uptake Transporter that Inhibit *Plasmodium falciparum* Parasite Proliferation

Yvett Sosa<sup>§||</sup>, Roman Deniskin<sup>§||</sup>, I.J. Frame<sup>§||</sup>, Matthew S. Steingina<sup>§</sup>, Deepak Bandyopadhyay<sup>§</sup>, Todd L. Graybill<sup>§</sup>, Lorena A. Kallal<sup>§</sup>, Michael T. Ouellette<sup>§</sup>, Andrew J. Pope<sup>%</sup>, Katherine L. Widdowson<sup>%</sup>, Robert J. Young<sup>§</sup>, Myles H. Akabas<sup>§†\*</sup>

<sup>§</sup>Department of Physiology & Biophysics, Albert Einstein College of Medicine, 1300 Morris Park Avenue, Bronx, NY 10461.

<sup>§</sup>Platform Technology & Science, <sup>%</sup>Discovery Partners in Academia, GlaxoSmithKline, 1250 S. Collegeville Road, Collegeville, Pennsylvania 19426.

<sup>†</sup>Departments of Neuroscience and of Medicine, Albert Einstein College of Medicine, 1300 Morris Park Avenue, Bronx, NY 10461.

<sup>||</sup>Contributed equally

\*Corresponding author. Myles Akabas, Dept. of Physiology & Biophysics, Albert Einstein College of Medicine, 1300 Morris Park Avenue, Bronx, NY 10461. Phone: 718-430-3360. Fax: 718-430-8819. Email: [myles.akabas@einstein.yu.edu](mailto:myles.akabas@einstein.yu.edu)

## Table of Contents

1. **Supplementary Table S1.** Small molecule screening data
2. **Supplementary Table S2.**  $XC_{50}$  values for various assays performed on 201 compounds from the primary HTS with  $XC_{50}$  values < 10  $\mu$ M in the 5-FUrd assay that were extensively characterized.
3. **Supplementary Table S3.**  $XC_{50}$  values for various assays performed on 123 compounds (Wave 2) that were identified by GSK chemists during hit expansion.
4. **Supplementary Figure S1.** Comparison of efficacy to kill WT 3D7 and *pfent1* $\Delta$  parasites and HepG2 cell cytotoxicity.
5. **Supplementary Figure S2.** Comparison of  $IC_{50}$  values in the 3D7 parasite proliferation assay and in the Yeast Kill Assay.
6. **Supplementary Data.**  $^1H$  and  $^{13}C$  NMR spectra confirming the structures of the six extensively characterized compounds.
  - a. GSK-1
  - b. GSK-2
  - c. GSK-3
  - d. GSK-4
  - e. GSK-5
  - f. GSK-6

**Supplementary Table S1. Small molecule screening data**

| Category | Parameter               | Description                                                                                                                                                                                                                                                                                                                                                                                                                                                                                                                                                                                                                                                                                    |
|----------|-------------------------|------------------------------------------------------------------------------------------------------------------------------------------------------------------------------------------------------------------------------------------------------------------------------------------------------------------------------------------------------------------------------------------------------------------------------------------------------------------------------------------------------------------------------------------------------------------------------------------------------------------------------------------------------------------------------------------------|
| Assay    | Type of assay           | Cell-based – <i>Saccharomyces cerevisiae</i>                                                                                                                                                                                                                                                                                                                                                                                                                                                                                                                                                                                                                                                   |
|          | Target                  | PfENT1 – <i>Plasmodium falciparum</i><br>Equilibrative Nucleoside Transporter Type 1                                                                                                                                                                                                                                                                                                                                                                                                                                                                                                                                                                                                           |
|          | Primary measurement     | Yeast cell growth (OD <sub>620</sub> )                                                                                                                                                                                                                                                                                                                                                                                                                                                                                                                                                                                                                                                         |
|          | Key reagents            | test compounds, 5-fluorouridine (5-FUrd), yeast cells, SDM growth media                                                                                                                                                                                                                                                                                                                                                                                                                                                                                                                                                                                                                        |
|          | Assay protocol          | 1) Add 0.08 µl of test compound (10 mM stock in 100% DMSO) to test wells<br>2) Yeast grown overnight in SDM media diluted to OD <sub>620</sub> = 0.05 with SDM media.<br>3) Add 5-FUrd to yeast cell suspension to a final concentration of 60 µM 5-FUrd<br>4) Add 8 µl cells (~8,000 cells) to each well; final concentrations: 10 µM test compound, 60 µM 5-FUrd, 1% DMSO v/v, 0.5 mM CHAPS in SDM media<br>5) Plates spun at 500 rpm for 1-2 min and equilibrated at room temperature (RT) for 30 min<br>6) Incubate for 16 h, 30 °C in humidified incubator<br>7) Plates were removed from the incubator and allowed to equilibrate at RT for at least 30 min<br>8) Read OD <sub>620</sub> |
| Library  | Library size            | 1,792,272                                                                                                                                                                                                                                                                                                                                                                                                                                                                                                                                                                                                                                                                                      |
|          | Library composition     | GSK Small Molecule Chemical Library                                                                                                                                                                                                                                                                                                                                                                                                                                                                                                                                                                                                                                                            |
|          | Source                  | GlaxoSmithKline                                                                                                                                                                                                                                                                                                                                                                                                                                                                                                                                                                                                                                                                                |
| Screen   | Format                  | 1536-well, round-well, flat-bottom Corning #3893                                                                                                                                                                                                                                                                                                                                                                                                                                                                                                                                                                                                                                               |
|          | Concentration(s) tested | 10 µM                                                                                                                                                                                                                                                                                                                                                                                                                                                                                                                                                                                                                                                                                          |

|                                     |                                                                                                                                                                     |
|-------------------------------------|---------------------------------------------------------------------------------------------------------------------------------------------------------------------|
| Plate controls                      | Minimum: no test compound + 60 $\mu$ M 5-FUrd +1% DMSO (v/v)<br>Maximum: no 5-FUrd +1% DMSO (v/v)                                                                   |
| Reagent/ compound dispensing system | ThermoFisher Multidrop Combi cat# 5840399                                                                                                                           |
| Detection instrument and software   | Perkin Elmer Envision Model# 2102                                                                                                                                   |
| Assay validation/QC                 | Every test plate contained positive and negative controls in the outer two columns; for 1350 plates, average Z'-score = $0.70 \pm 0.05$ , average S/B = $5.3 \pm 1$ |
| Correction factors                  | None                                                                                                                                                                |
| Normalization                       | Well OD <sub>620</sub> were normalized as a percentage of the maximum values in the control wells                                                                   |

---

|                   |                                     |                                                                                                                                                                                                                                                                 |
|-------------------|-------------------------------------|-----------------------------------------------------------------------------------------------------------------------------------------------------------------------------------------------------------------------------------------------------------------|
| Post-HTS analysis | Initial Hit criteria                | Compounds with activity > 9.1% of maximal growth, >3 SD above the mean of the sample population                                                                                                                                                                 |
|                   | Hit rate                            | 3.9%                                                                                                                                                                                                                                                            |
|                   | Hit criteria for extensive analysis | Compounds with activity > 28% of maximal growth, $\geq 10$ SD above the mean of the sample population (N=4104), plus 190 compounds with activity between 3 and 10 SD above the mean of the sample population were selected based on chemical scaffold diversity |
|                   | Hit rate > 10 SD                    | 0.2%                                                                                                                                                                                                                                                            |
|                   | Additional assay(s)                 | Concentration-responses in 5-FUrd primary growth-rescue assay, orthogonal adenosine-dependent growth inhibition assay, [ <sup>3</sup> H]adenosine uptake inhibition assay, HepG2 cell cytotoxicity assay, <i>P. falciparum</i> cytotoxicity assay               |

Confirmation of hit purity and structure

Fresh compound was purchased directly from Enamine or ChemDiv. Purity and structure were confirmed by NMR

---

**Supplementary Table S2.**  $XC_{50}$  values for various assays performed on 201 compounds from the primary HTS with  $XC_{50}$  values < 10  $\mu$ M in the 5-FUrd assay that were extensively characterized.

| GSK Blinded Identifier | Plate | Well | IC50 for inhibition of adenosine-dependent growth of ade2Δ + PfENT1-expressing yeast |                                            |                                            | IC50 for inhibition of 50 nM [3H]adenosine uptake into ade2Δ + PfENT1-expressing yeast, 15-min uptake assay (M) | IC50 for inhibition of 250 nM [3H]Uridine into ade2Δ + PfENT1-expressing yeast, 15-min uptake assay (M) | HepG2 pIC50 MEAN MOD | HepG2 pIC50 MEAN | HepG2 pIC50 N_INC_AN | HepG2 pIC50 N_TOTAL. May be greater than value in column L |
|------------------------|-------|------|--------------------------------------------------------------------------------------|--------------------------------------------|--------------------------------------------|-----------------------------------------------------------------------------------------------------------------|---------------------------------------------------------------------------------------------------------|----------------------|------------------|----------------------|------------------------------------------------------------|
|                        |       |      | IC50 48 hr 3D7 parasite viability (M)                                                | IC50 48hr PfENT1-KO parasite viability (M) | IC50 48hr PfENT1-KO parasite viability (M) |                                                                                                                 |                                                                                                         |                      |                  |                      |                                                            |
| U000H91_A1             | H91   | A1   | 2.00E-05                                                                             | 2.21E-05                                   | 2.41E-06                                   | 9.23E-08                                                                                                        | 7.51E-08                                                                                                | <                    | 4                | 2                    | 2                                                          |
| U000H91_A2             | H91   | A2   | 4.55E-05                                                                             | NE                                         | 3.87E-07                                   | 3.41E-08                                                                                                        | 2.79E-08                                                                                                | <                    | 4                | 2                    | 2                                                          |
| U000H91_A3             | H91   | A3   | 1.54E-05                                                                             | 2.94E-05                                   | 5.09E-07                                   | 5.40E-08                                                                                                        | 3.10E-08                                                                                                | =                    | 4.1              | 1                    | 2                                                          |
| U000H91_A4             | H91   | A4   | NE                                                                                   | NE                                         | 1.36E-06                                   | 4.41E-08                                                                                                        | 4.11E-08                                                                                                | <                    | 4                | 4                    | 4                                                          |
| U000H91_A5             | H91   | A5   | 7.31E-06                                                                             | 2.24E-05                                   | 3.41E-08                                   | 2.82E-08                                                                                                        | 2.73E-08                                                                                                | =                    | 4.2              | 4                    | 4                                                          |
| U000H91_A6             | H91   | A6   | 9.84E-06                                                                             | 1.15E-05                                   | 1.44E-07                                   | 3.30E-06                                                                                                        | 2.71E-06                                                                                                | <                    | 4                | 2                    | 2                                                          |
| U000H91_A7             | H91   | A7   | NE                                                                                   | NE                                         | 2.60E-07                                   | 2.63E-07                                                                                                        | 5.22E-07                                                                                                | <                    | 4                | 2                    | 2                                                          |
| U000H91_A8             | H91   | A8   | 5.44E-05                                                                             | 8.02E-05                                   | 2.51E-07                                   | 9.30E-08                                                                                                        | 8.43E-08                                                                                                | <                    | 4                | 2                    | 2                                                          |
| U000H91_A9             | H91   | A9   | 2.83E-05                                                                             | low activity                               | 4.53E-07                                   | 2.93E-08                                                                                                        | 3.19E-08                                                                                                | <                    | 4                | 2                    | 2                                                          |
| U000H91_A10            | H91   | A10  | 2.56E-05                                                                             | 1.65E-05                                   | 2.95E-07                                   | 4.50E-08                                                                                                        | 3.01E-08                                                                                                | <                    | 4                | 2                    | 2                                                          |
| U000H92_A1             | H92   | A1   | 4.38E-06                                                                             | 3.70E-06                                   | 6.36E-07                                   | 3.65E-08                                                                                                        | 4.63E-08                                                                                                | <                    | 4                | 2                    | 2                                                          |
| U000H92_A2             | H92   | A2   | 5.10E-05                                                                             | 4.72E-05                                   | 9.52E-07                                   | NE                                                                                                              | NE                                                                                                      | <                    | 4                | 2                    | 2                                                          |
| U000H92_A3             | H92   | A3   | 3.24E-05                                                                             | 3.02E-05                                   | 1.47E-06                                   | 1.49E-07                                                                                                        | 4.04E-07                                                                                                | =                    | 4                | 1                    | 2                                                          |
| U000H92_A4             | H92   | A4   | 1.72E-05                                                                             | NE                                         | 7.64E-07                                   | NE                                                                                                              | NE                                                                                                      | <                    | 4                | 2                    | 2                                                          |
| U000H92_A5             | H92   | A5   | 5.37E-05                                                                             | NE                                         | 4.05E-07                                   | 3.20E-06                                                                                                        | 4.57E-06                                                                                                | =                    | 4.4              | 2                    | 2                                                          |
| U000H92_A6             | H92   | A6   | 4.41E-05                                                                             | NE                                         | 3.48E-07                                   | 6.72E-07                                                                                                        | 6.91E-07                                                                                                | <                    | 4                | 2                    | 2                                                          |
| U000H92_A7             | H92   | A7   | 5.30E-06                                                                             | 4.95E-06                                   | 2.68E-07                                   | 4.26E-08                                                                                                        | 3.50E-08                                                                                                | <                    | 4                | 2                    | 2                                                          |
| U000H92_A8             | H92   | A8   | 6.04E-06                                                                             | 4.00E-05                                   | 1.74E-07                                   | 4.83E-08                                                                                                        | 5.93E-08                                                                                                | <                    | 4                | 2                    | 2                                                          |
| U000H92_A9             | H92   | A9   | 2.04E-06                                                                             | 1.91E-06                                   | 4.85E-07                                   | 3.56E-06                                                                                                        | 3.69E-06                                                                                                | =                    | 4.6              | 2                    | 2                                                          |
| U000H92_A10            | H92   | A10  | 1.45E-05                                                                             | 1.65E-05                                   | 6.18E-07                                   | 3.72E-08                                                                                                        | 2.89E-08                                                                                                | <                    | 4                | 2                    | 2                                                          |
| U000H93_A1             | H93   | A1   | 9.61E-06                                                                             | 1.37E-05                                   | 6.63E-07                                   | 3.32E-08                                                                                                        | 3.63E-08                                                                                                | <                    | 4                | 4                    | 4                                                          |
| U000H93_A2             | H93   | A2   | 4.54E-05                                                                             | NE                                         | 1.10E-07                                   | 2.12E-06                                                                                                        | 8.76E-07                                                                                                | =                    | 4.1              | 1                    | 2                                                          |
| U000H93_A3             | H93   | A3   | 1.11E-05                                                                             | 8.41E-06                                   | 5.27E-07                                   | 1.41E-07                                                                                                        | 9.76E-08                                                                                                | <                    | 4                | 2                    | 2                                                          |
| U000H94_A1             | H94   | A1   | 3.30E-05                                                                             | 5.12E-05                                   | 1.59E-06                                   | 6.91E-08                                                                                                        | 1.25E-07                                                                                                | <                    | 4                | 2                    | 2                                                          |
| U000H94_A2             | H94   | A2   | 1.17E-05                                                                             | 1.28E-05                                   | 9.65E-07                                   | 3.48E-08                                                                                                        | 4.72E-08                                                                                                | <                    | 4                | 2                    | 2                                                          |
| U000H94_A3             | H94   | A3   | 9.60E-06                                                                             | 2.32E-05                                   | 2.60E-07                                   | 3.42E-08                                                                                                        | 3.45E-08                                                                                                | =                    | 4.1              | 2                    | 2                                                          |
| U000H94_A4             | H94   | A4   | 7.15E-06                                                                             | 6.37E-06                                   | 7.47E-07                                   | 4.25E-08                                                                                                        | 6.80E-08                                                                                                | =                    | 4.2              | 1                    | 2                                                          |
| U000H94_A5             | H94   | A5   | 2.81E-06                                                                             | 9.39E-06                                   | 2.94E-07                                   | 3.34E-08                                                                                                        | 5.60E-08                                                                                                | =                    | 4.3              | 1                    | 2                                                          |
| U000H94_A6             | H94   | A6   | NE                                                                                   | NE                                         | 4.45E-07                                   | 3.32E-08                                                                                                        | 3.46E-08                                                                                                | <                    | 4                | 2                    | 2                                                          |
| U000H94_A7             | H94   | A7   | 2.65E-05                                                                             | 3.00E-05                                   | 3.68E-08                                   | 1.54E-06                                                                                                        | 2.54E-06                                                                                                | =                    | 4.5              | 1                    | 2                                                          |
| U000H94_A8             | H94   | A8   | 4.77E-05                                                                             | 6.04E-05                                   | 1.45E-06                                   | 8.12E-08                                                                                                        | 1.56E-07                                                                                                | =                    | 4                | 1                    | 2                                                          |
| U000H94_A9             | H94   | A9   | 3.27E-05                                                                             | 3.44E-05                                   | 4.78E-07                                   | 1.95E-06                                                                                                        | 2.52E-06                                                                                                | =                    | 4.6              | 4                    | 4                                                          |
| U000H94_A10            | H94   | A10  | 4.79E-05                                                                             | 4.92E-05                                   | 2.33E-07                                   | 1.61E-07                                                                                                        | 2.96E-07                                                                                                | <                    | 4                | 2                    | 2                                                          |
| U000H97_A1             | H97   | A1   | 2.56E-05                                                                             | 2.62E-05                                   | 1.13E-06                                   | 1.40E-06                                                                                                        | 2.86E-06                                                                                                | <                    | 4                | 2                    | 2                                                          |
| U000H97_A2             | H97   | A2   | 2.34E-05                                                                             | 3.23E-05                                   | 3.01E-07                                   | 7.06E-08                                                                                                        | 4.45E-08                                                                                                | =                    | 5.1              | 2                    | 4                                                          |
| U000H97_A3             | H97   | A3   | NE                                                                                   | NE                                         | 1.16E-07                                   | 5.16E-07                                                                                                        | 7.66E-07                                                                                                | <                    | 4                | 2                    | 2                                                          |
| U000H97_A4             | H97   | A4   | 1.62E-05                                                                             | 9.64E-05                                   | 3.73E-07                                   | 2.83E-07                                                                                                        | 8.32E-07                                                                                                | <                    | 4                | 2                    | 2                                                          |
| U000H97_A5             | H97   | A5   | 3.11E-06                                                                             | 5.77E-06                                   | 6.94E-08                                   | 4.43E-08                                                                                                        | 9.56E-08                                                                                                | <                    | 4                | 4                    | 4                                                          |
| U000H97_A6             | H97   | A6   | 1.80E-05                                                                             | 1.47E-05                                   | 1.19E-08                                   | 1.68E-06                                                                                                        | 3.82E-06                                                                                                | <                    | 4                | 2                    | 2                                                          |
| U000H97_A7             | H97   | A7   | 2.72E-05                                                                             | 3.52E-05                                   | 4.56E-07                                   | 3.51E-08                                                                                                        | 7.12E-08                                                                                                | <                    | 4                | 2                    | 2                                                          |
| U000H97_A8             | H97   | A8   | 5.13E-05                                                                             | NE                                         | 8.25E-07                                   | 3.92E-08                                                                                                        | 5.24E-08                                                                                                | <                    | 4                | 2                    | 2                                                          |
| U000H97_A9             | H97   | A9   | 4.24E-05                                                                             | 3.93E-05                                   | 4.55E-07                                   | NE                                                                                                              | NE                                                                                                      | <                    | 4                | 2                    | 2                                                          |
| U000H97_A10            | H97   | A10  | 7.25E-05                                                                             | 7.72E-05                                   | 1.23E-07                                   | 3.33E-06                                                                                                        | 3.06E-06                                                                                                | <                    | 4                | 2                    | 2                                                          |
| U000H98_A1             | H98   | A1   | 2.26E-05                                                                             | 2.81E-05                                   | 6.76E-08                                   | 9.33E-06                                                                                                        | 9.44E-06                                                                                                | <                    | 4                | 2                    | 2                                                          |
| U000H98_A2             | H98   | A2   | 3.17E-05                                                                             | 4.52E-05                                   | 5.12E-07                                   | 4.25E-08                                                                                                        | 5.58E-08                                                                                                | <                    | 4                | 2                    | 2                                                          |
| U000H98_A3             | H98   | A3   | 2.13E-06                                                                             | 2.23E-06                                   | 3.37E-07                                   | 2.54E-07                                                                                                        | 6.51E-07                                                                                                | <                    | 4                | 4                    | 4                                                          |
| U000H98_A4             | H98   | A4   | 1.70E-06                                                                             | 1.09E-05                                   | 2.35E-07                                   | 6.32E-08                                                                                                        | 1.02E-07                                                                                                | =                    | 4.3              | 2                    | 2                                                          |
| U000H98_A5             | H98   | A5   | 8.48E-06                                                                             | 2.03E-05                                   | 7.14E-07                                   | 8.52E-08                                                                                                        | 1.23E-07                                                                                                | <                    | 4                | 2                    | 2                                                          |
| U000H98_A6             | H98   | A6   | 3.09E-05                                                                             | 3.22E-05                                   | 8.59E-08                                   | 1.23E-06                                                                                                        | 2.84E-06                                                                                                | =                    | 4.4              | 2                    | 2                                                          |
| U000H98_A7             | H98   | A7   | 3.16E-05                                                                             | 2.75E-05                                   | 4.50E-08                                   | 1.39E-07                                                                                                        | 4.10E-07                                                                                                | <                    | 4                | 2                    | 2                                                          |
| U000H98_A8             | H98   | A8   | 2.56E-05                                                                             | NE                                         | 2.03E-07                                   | 3.81E-08                                                                                                        | 4.57E-08                                                                                                | =                    | 4.2              | 2                    | 2                                                          |
| U000H98_A9             | H98   | A9   | 3.09E-05                                                                             | 2.66E-05                                   | 1.46E-06                                   | 4.14E-06                                                                                                        | 5.54E-06                                                                                                | <                    | 4                | 2                    | 2                                                          |
| U000H98_A10            | H98   | A10  | 2.92E-05                                                                             | 2.90E-05                                   | 5.87E-06                                   | 6.89E-07                                                                                                        | 1.14E-06                                                                                                | =                    | 4.4              | 2                    | 2                                                          |
| U000H99_A1             | H99   | A1   | 4.13E-05                                                                             | NE                                         | 9.75E-07                                   | 6.83E-08                                                                                                        | 6.35E-08                                                                                                | <                    | 4                | 2                    | 2                                                          |

|                 |     |              |              |          |              |              |             |     |   |   |
|-----------------|-----|--------------|--------------|----------|--------------|--------------|-------------|-----|---|---|
| U000H99_A2 H99  | A2  | 2.97E-05     | 3.59E-04     | 6.67E-07 | 2.89E-06     | 3.80E-06     | =           | 4.2 | 2 | 2 |
| U000H99_A3 H99  | A3  | NE           | NE           | 3.26E-08 | 1.44E-05     | low activity | <           | 4   | 2 | 2 |
| U000H99_A4 H99  | A4  | 3.12E-05     | 3.08E-05     | 3.27E-07 | 4.19E-06     | 4.90E-07     | =           | 4.3 | 2 | 2 |
| U000H99_A5 H99  | A5  | 3.94E-05     | NE           | 1.30E-07 | 6.84E-08     | 3.90E-08     | <           | 4   | 2 | 2 |
| U000H99_A6 H99  | A6  | 6.61E-05     | low activity | 5.97E-08 | 7.52E-08     | 1.60E-07     | <           | 4   | 2 | 2 |
| U000H99_A7 H99  | A7  | 3.44E-05     | 8.33E-05     | 3.57E-07 | 6.17E-06     | low activity | =           | 4   | 1 | 2 |
| U000H99_A8 H99  | A8  | 4.37E-05     | NE           | 3.66E-07 | 1.04E-05     | low activity | <           | 4   | 2 | 2 |
| U000H99_A9 H99  | A9  | 9.62E-05     | NE           | 1.81E-07 | 2.38E-06     | 6.71E-06     | =           | 4   | 1 | 2 |
| U000H99_A10 H99 | A10 | NE           | NE           | 3.75E-07 | 2.19E-07     | 7.50E-07     | <           | 4   | 2 | 2 |
| U000H9A_A1 H9A  | A1  | 1.27E-05     | 4.83E-05     | 2.84E-07 | 2.86E-08     | 3.51E-08     | <           | 4   | 2 | 2 |
| U000H9A_A2 H9A  | A2  | 1.80E-05     | ND           | ND       | 3.19E-08     | 3.02E-08     | <           | 4   | 2 | 2 |
| U000H9A_A3 H9A  | A3  | 4.17E-05     | NE           | 7.22E-07 | NE           | NE           | =           | 4.1 | 1 | 2 |
| U000H9A_A4 H9A  | A4  | NE           | low activity | NE       | NE           | NE           | <           | 4   | 2 | 2 |
| U000H9A_A5 H9A  | A5  | 3.32E-05     | 9.30E-05     | 6.81E-07 | 1.98E-06     | low activity | <           | 4   | 2 | 2 |
| U000H9A_A6 H9A  | A6  | 8.94E-05     | 9.75E-05     | 2.03E-06 | 3.20E-06     | 5.55E-06     | <           | 4   | 2 | 2 |
| U000H9A_A7 H9A  | A7  | 2.00E-05     | 5.31E-05     | 1.87E-06 | 1.90E-06     | 4.13E-06     | <           | 4   | 2 | 2 |
| U000H9A_A8 H9A  | A8  | 3.09E-05     | 4.72E-05     | 4.24E-07 | 1.56E-06     | 3.92E-06     | <           | 4   | 2 | 2 |
| U000H9A_A9 H9A  | A9  | 1.81E-05     | 3.80E-05     | 5.47E-07 | 6.53E-08     | 3.80E-08     | <           | 4   | 2 | 2 |
| U000H9A_A10 H9A | A10 | 3.08E-05     | 4.93E-05     | 6.41E-07 | 7.08E-06     | low activity | <           | 4   | 4 | 4 |
| U000H9B_A1 H9B  | A1  | 3.35E-05     | 3.81E-05     | 2.19E-06 | low activity | low activity | =           | 4.3 | 2 | 2 |
| U000H9B_A2 H9B  | A2  | 2.86E-05     | 5.13E-05     | 3.08E-07 | 4.97E-07     | 9.83E-07     | =           | 4.1 | 2 | 2 |
| U000H9B_A3 H9B  | A3  | 1.37E-05     | 1.26E-05     | 1.17E-06 | 6.29E-06     | 1.77E-06     | =           | 4.4 | 1 | 2 |
| U000H9B_A4 H9B  | A4  | 9.95E-05     | NE           | 3.65E-07 | NE           | NE           | <           | 4   | 2 | 2 |
| U000H9B_A5 H9B  | A5  | low activity | NE           | 2.14E-07 | 3.23E-08     | 8.30E-08     | <           | 4   | 2 | 2 |
| U000H9B_A6 H9B  | A6  | 3.45E-05     | low activity | 2.27E-07 | low activity | low activity | <           | 4   | 2 | 2 |
| U000H9B_A7 H9B  | A7  | 3.24E-05     | low activity | 8.40E-07 | 2.96E-08     | 9.50E-08     | <           | 4   | 2 | 2 |
| U000H9B_A8 H9B  | A8  | 3.04E-05     | 4.66E-05     | 5.23E-07 | low activity | NE           | =           | 4.2 | 2 | 2 |
| U000H9B_A9 H9B  | A9  | 1.75E-05     | 1.85E-05     | 2.51E-07 | 2.93E-08     | 9.98E-08     | =           | 4.3 | 2 | 2 |
| U000H9B_A10 H9B | A10 | 2.78E-05     | 7.09E-05     | 1.10E-07 | 4.08E-08     | 9.97E-08     | <           | 4   | 2 | 2 |
| U000H9D_A1 H9D  | A1  | 3.50E-05     | 2.71E-05     | 8.87E-07 | 4.15E-08     | 4.31E-08     | <           | 4   | 2 | 2 |
| U000H9D_A2 H9D  | A2  | NE           | NE           | 3.67E-07 | 5.02E-08     | 8.00E-08     | ND ND ND ND |     |   |   |
| U000H9D_A3 H9D  | A3  | 3.04E-05     | 2.80E-05     | 3.62E-08 | 2.72E-06     | 8.58E-06     | =           | 4.6 | 2 | 2 |
| U000H9D_A4 H9D  | A4  | 1.03E-05     | NE           | 1.23E-06 | 3.98E-06     | 6.13E-06     | <           | 4   | 2 | 2 |
| U000H9D_A5 H9D  | A5  | 3.63E-05     | 6.59E-05     | 1.32E-06 | 1.14E-06     | 2.70E-06     | =           | 4.3 | 2 | 2 |
| U000H9D_A6 H9D  | A6  | 7.98E-06     | 6.23E-06     | 1.11E-06 | low activity | low activity | =           | 4.6 | 1 | 2 |
| U000H9D_A7 H9D  | A7  | 3.29E-05     | 3.32E-05     | 1.50E-06 | 7.99E-07     | 2.42E-06     | =           | 4.3 | 2 | 2 |
| U000H9D_A8 H9D  | A8  | 1.92E-05     | NE           | 4.67E-07 | 4.41E-08     | 5.34E-08     | <           | 4   | 2 | 2 |
| U000H9D_A9 H9D  | A9  | 1.67E-05     | 1.96E-05     | 1.06E-06 | 4.46E-08     | 8.46E-08     | =           | 4.1 | 2 | 2 |
| U000H9D_A10 H9D | A10 | 7.98E-06     | 1.43E-05     | 5.93E-07 | 7.02E-08     | 9.06E-08     | =           | 4.3 | 2 | 2 |
| U000H9E_A1 H9E  | A1  | 7.89E-07     | 2.42E-05     | 5.37E-07 | 1.23E-07     | 4.50E-07     | <           | 4   | 2 | 2 |
| U000H9E_A2 H9E  | A2  | NE           | low activity | 5.39E-07 | 4.43E-08     | 3.48E-08     | <           | 4   | 2 | 2 |
| U000H9E_A3 H9E  | A3  | 5.95E-05     | low activity | 1.34E-07 | 7.81E-07     | 4.02E-06     | <           | 4   | 2 | 2 |
| U000H9E_A4 H9E  | A4  | NE           | 1.70E-05     | ND       | 1.14E-07     | 4.05E-07     | =           | 4   | 2 | 2 |
| U000H9E_A5 H9E  | A5  | 1.41E-05     | 2.65E-05     | 4.50E-07 | 1.16E-07     | 4.96E-08     | =           | 4   | 1 | 2 |
| U000H9E_A6 H9E  | A6  | NE           | NE           | 4.16E-07 | 4.32E-06     | 1.07E-05     | <           | 4   | 2 | 2 |
| U000H9E_A7 H9E  | A7  | 1.17E-05     | 3.93E-06     | 4.45E-07 | 4.13E-08     | 4.21E-08     | =           | 4.4 | 2 | 2 |
| U000H9E_A8 H9E  | A8  | 3.38E-05     | 3.61E-05     | 2.02E-06 | 1.69E-06     | 6.85E-06     | =           | 4.3 | 2 | 2 |
| U000HAV_A1 HAV  | A1  | 1.52E-05     | 4.17E-05     | 1.79E-07 | 1.29E-06     | 9.21E-07     | <           | 4   | 2 | 2 |
| U000HAV_A2 HAV  | A2  | 3.55E-05     | 3.63E-05     | 8.29E-07 | 8.59E-06     | 3.34E-06     | <           | 4   | 2 | 2 |
| U000HAV_A3 HAV  | A3  | 3.06E-05     | 3.68E-05     | 6.51E-07 | 4.62E-08     | 3.93E-08     | =           | 4.4 | 1 | 2 |
| U000HAV_A4 HAV  | A4  | 3.14E-05     | 3.73E-05     | 4.14E-07 | 2.17E-06     | 3.36E-06     | =           | 4.4 | 3 | 3 |
| U000HAV_A5 HAV  | A5  | 4.60E-05     | 5.99E-05     | 4.22E-06 | 7.06E-06     | 8.73E-06     | =           | 4.5 | 1 | 2 |
| U000HAV_A6 HAV  | A6  | 4.89E-05     | 5.59E-05     | 9.67E-08 | 3.40E-06     | 3.51E-06     | =           | 4.4 | 1 | 2 |
| U000HAV_A7 HAV  | A7  | 1.47E-05     | 3.27E-05     | 7.13E-08 | 2.79E-08     | 2.85E-08     | =           | 4.5 | 1 | 2 |
| U000HAV_A8 HAV  | A8  | 4.75E-05     | 6.69E-05     | 5.88E-07 | 3.67E-06     | 4.89E-06     | =           | 4.2 | 2 | 2 |
| U000HAV_A9 HAV  | A9  | 1.69E-05     | 2.11E-05     | 2.70E-07 | 5.16E-06     | 1.02E-05     | =           | 4   | 4 | 4 |
| U000HAV_A10 HAV | A10 | 1.77E-05     | 2.26E-05     | 5.04E-07 | 4.43E-08     | 5.63E-08     | =           | 4.6 | 1 | 2 |
| U000HT5_A1 HT5  | A1  | 1.28E-04     | 3.19E-05     | 2.99E-07 | 9.01E-08     | 2.02E-07     | <           | 4   | 2 | 2 |
| U000HT5_A2 HT5  | A2  | 1.00E-05     | 1.86E-05     | 5.97E-08 | 5.52E-07     | 1.19E-06     | <           | 4   | 2 | 2 |
| U000HT5_A3 HT5  | A3  | NE           | low activity | NE       | 3.25E-06     | 9.50E-06     | <           | 4   | 2 | 2 |
| U000HT5_A4 HT5  | A4  | 2.17E-06     | 7.11E-06     | 1.46E-07 | 5.48E-08     | 4.43E-08     | <           | 4   | 4 | 4 |
| U000HT5_A5 HT5  | A5  | 1.70E-05     | 2.34E-05     | 3.53E-07 | 2.14E-07     | 2.88E-07     | <           | 4   | 2 | 2 |
| U000HT5_A6 HT5  | A6  | 2.66E-05     | 4.02E-05     | 4.15E-07 | 1.27E-07     | 1.35E-07     | <           | 4   | 2 | 2 |



|             |     |     |              |              |          |              |              |    |     |    |    |
|-------------|-----|-----|--------------|--------------|----------|--------------|--------------|----|-----|----|----|
| U000HT5_A7  | HT5 | A7  | NE           | low activity | 8.98E-07 | 1.13E-07     | 5.22E-07     | <  | 4   | 2  | 2  |
| U000HT5_A8  | HT5 | A8  | 3.03E-05     | 4.20E-05     | 1.59E-06 | 5.13E-08     | 5.29E-08     | <  | 4   | 2  | 2  |
| U000HT5_A9  | HT5 | A9  | 2.97E-05     | 2.74E-05     | 5.41E-07 | 3.40E-06     | 5.80E-06     | =  | 4.3 | 2  | 2  |
| U000HT5_A10 | HT5 | A10 | 2.36E-05     | 1.25E-05     | 5.03E-07 | 3.69E-08     | 3.84E-08     | <  | 4   | 2  | 2  |
| U000HT6_A1  | HT6 | A1  | 2.25E-06     | 2.64E-06     | 1.18E-07 | 3.44E-08     | 6.04E-08     | <  | 4   | 4  | 4  |
| U000HT6_A2  | HT6 | A2  | 6.88E-06     | 3.87E-05     | 4.33E-07 | 1.95E-08     | 3.43E-08     | <  | 4   | 2  | 2  |
| U000HT6_A3  | HT6 | A3  | NE           | 8.88E-05     | 9.99E-07 | 2.06E-06     | 2.84E-06     | <  | 4   | 2  | 2  |
| U000HT6_A4  | HT6 | A4  | 8.73E-06     | 3.62E-05     | 1.81E-07 | 4.70E-08     | 3.68E-08     | <  | 4   | 2  | 2  |
| U000HT6_A5  | HT6 | A5  | 3.98E-05     | 4.61E-05     | 4.11E-08 | 2.94E-07     | 3.01E-07     | <  | 4   | 2  | 2  |
| U000HT6_A6  | HT6 | A6  | 2.47E-05     | 7.35E-05     | 2.41E-07 | 3.54E-08     | 3.04E-08     | <  | 4   | 2  | 2  |
| U000HT6_A7  | HT6 | A7  | NE           | 9.74E-05     | 7.60E-07 | 4.99E-07     | 1.11E-06     | <  | 4   | 2  | 2  |
| U000HT6_A8  | HT6 | A8  | 2.90E-06     | 1.96E-05     | 1.46E-07 | 3.57E-08     | 2.98E-08     | <  | 4   | 2  | 2  |
| U000HT6_A9  | HT6 | A9  | 1.83E-05     | 1.65E-05     | 4.88E-07 | 3.67E-06     | 5.23E-06     | =  | 4.3 | 4  | 4  |
| U000HT6_A10 | HT6 | A10 | 1.28E-05     | 1.65E-05     | 2.09E-07 | 4.77E-08     | 5.14E-08     | =  | 4.2 | 2  | 2  |
| U000HT7_A1  | HT7 | A1  | 1.29E-04     | NE           | 1.37E-06 | 3.77E-08     | 7.50E-08     | <  | 4   | 2  | 2  |
| U000HT7_A2  | HT7 | A2  | low activity | 4.63E-05     | 9.99E-07 | 4.69E-08     | 5.55E-08     | =  | 4.2 | 1  | 2  |
| U000HT7_A3  | HT7 | A3  | NE           | NE           | 8.25E-07 | 3.68E-08     | 3.81E-08     | <  | 4   | 2  | 2  |
| U000HT7_A4  | HT7 | A4  | NE           | NE           | 4.49E-07 | 6.58E-08     | 4.48E-08     | <  | 4   | 2  | 2  |
| U000HT7_A5  | HT7 | A5  | 5.21E-05     | 2.34E-05     | 5.80E-07 | 7.50E-08     | 2.90E-08     | <  | 4   | 1  | 1  |
| U000HT7_A6  | HT7 | A6  | 3.79E-06     | 6.27E-06     | 2.82E-07 | 5.82E-08     | 3.57E-08     | <  | 4   | 2  | 2  |
| U000HT7_A7  | HT7 | A7  | 3.26E-05     | 4.39E-05     | 5.73E-07 | 8.35E-07     | 5.52E-06     | =  | 4.3 | 2  | 2  |
| U000HT7_A8  | HT7 | A8  | 7.06E-05     | NE           | 5.32E-07 | 2.99E-06     | 4.83E-06     | <  | 4   | 2  | 2  |
| U000HT7_A9  | HT7 | A9  | 1.21E-05     | 1.84E-05     | 3.20E-07 | 5.34E-08     | 3.11E-08     | ND | ND  | ND | ND |
| U000HT7_A10 | HT7 | A10 | 3.14E-05     | 2.33E-05     | 2.08E-06 | 4.71E-07     | 7.47E-07     | =  | 4.3 | 2  | 2  |
| U000HT8_A1  | HT8 | A1  | 1.79E-05     | 4.18E-05     | 2.61E-07 | 4.93E-08     | 7.32E-08     | <  | 4   | 2  | 2  |
| U000HT8_A2  | HT8 | A2  | 5.27E-05     | 2.56E-05     | 1.31E-07 | 2.64E-06     | 2.30E-06     | =  | 4.4 | 2  | 2  |
| U000HT8_A3  | HT8 | A3  | 3.44E-05     | 5.51E-05     | 2.14E-07 | 4.77E-08     | 4.54E-08     | <  | 4   | 2  | 2  |
| U000HT8_A4  | HT8 | A4  | NE           | low activity | 1.43E-07 | 9.17E-08     | 1.96E-07     | <  | 4   | 2  | 2  |
| U000HT8_A5  | HT8 | A5  | NE           | low activity | 2.53E-08 | 5.07E-06     | 3.97E-06     | <  | 4   | 2  | 2  |
| U000HT8_A6  | HT8 | A6  | 3.24E-05     | 9.29E-06     | 4.00E-07 | 3.56E-06     | 7.02E-06     | =  | 4.8 | 1  | 2  |
| U000HT8_A7  | HT8 | A7  | 1.12E-05     | 2.06E-05     | 1.79E-07 | 1.31E-06     | 2.01E-06     | <  | 4   | 2  | 2  |
| U000HT8_A8  | HT8 | A8  | 2.25E-05     | 2.58E-05     | 1.08E-06 | 5.03E-08     | 5.04E-08     | <  | 4   | 2  | 2  |
| U000HT8_A9  | HT8 | A9  | 2.00E-05     | 2.57E-05     | 3.68E-07 | 1.03E-06     | 1.44E-06     | =  | 4.7 | 2  | 2  |
| U000HT8_A10 | HT8 | A10 | 8.65E-06     | 6.66E-05     | 3.24E-07 | 4.80E-08     | 6.03E-08     | <  | 4   | 2  | 2  |
| U000HTR_A1  | HTR | A1  | 2.38E-05     | 2.65E-05     | 5.16E-07 | 1.85E-07     | 3.12E-07     | <  | 4   | 2  | 2  |
| U000HTR_A2  | HTR | A2  | NE           | NE           | 3.12E-07 | 3.83E-07     | 4.24E-07     | <  | 4   | 2  | 2  |
| U000HTR_A3  | HTR | A3  | 7.20E-05     | low activity | 2.33E-06 | 4.69E-08     | 1.06E-07     | <  | 4   | 6  | 6  |
| U000HTR_A4  | HTR | A4  | 2.95E-05     | 2.59E-05     | 2.31E-07 | low activity | low activity | <  | 4   | 2  | 2  |
| U000HTR_A5  | HTR | A5  | NE           | 1.40E-05     | 2.75E-07 | low activity | low activity | <  | 4   | 2  | 2  |
| U000HTR_A6  | HTR | A6  | 2.91E-05     | 2.07E-05     | 5.30E-07 | 3.44E-06     | 1.36E-06     | <  | 4   | 4  | 4  |
| U000HTR_A7  | HTR | A7  | 8.55E-06     | 6.92E-06     | 8.81E-07 | low activity | low activity | =  | 5   | 1  | 2  |
| U000HTR_A8  | HTR | A8  | 4.12E-06     | 6.17E-06     | 1.60E-07 | 4.11E-08     | 6.00E-08     | <  | 4   | 2  | 2  |
| U000HTR_A9  | HTR | A9  | 3.01E-05     | 2.92E-05     | 1.94E-07 | 2.30E-06     | 2.75E-06     | =  | 4.6 | 2  | 2  |
| U000HTR_A10 | HTR | A10 | 4.00E-05     | 2.01E-05     | 5.71E-07 | 3.58E-06     | 1.75E-06     | =  | 4.1 | 1  | 2  |
| U000HTU_A1  | HTU | A1  | 1.59E-05     | 2.10E-05     | 2.26E-07 | 3.85E-08     | 7.73E-08     | =  | 4.3 | 1  | 2  |
| U000HTU_A2  | HTU | A2  | 6.37E-06     | low activity | 1.67E-07 | 2.93E-08     | 3.39E-08     | <  | 4   | 2  | 2  |
| U000HTU_A3  | HTU | A3  | NE           | NE           | 4.92E-07 | 3.01E-08     | 4.29E-08     | <  | 4   | 2  | 2  |
| U000HTU_A4  | HTU | A4  | 5.00E-05     | 2.00E-05     | 2.24E-07 | 4.30E-07     | 6.22E-07     | <  | 4   | 2  | 2  |
| U000HTU_A5  | HTU | A5  | 3.59E-05     | 3.67E-05     | 1.40E-07 | 5.18E-08     | 1.09E-07     | <  | 4   | 4  | 4  |
| U000HTU_A6  | HTU | A6  | 2.52E-05     | 1.52E-05     | 1.14E-07 | 6.60E-08     | 1.04E-07     | =  | 4.2 | 1  | 2  |
| U000HTU_A7  | HTU | A7  | 7.50E-06     | 1.14E-05     | 2.01E-07 | 7.13E-07     | 1.25E-06     | =  | 4.4 | 2  | 2  |
| U000HTU_A8  | HTU | A8  | 4.57E-05     | 9.85E-05     | 1.78E-07 | 2.43E-07     | 6.87E-07     | =  | 4.1 | 2  | 2  |
| U000HTU_A9  | HTU | A9  | 1.86E-04     | NE           | 2.43E-07 | 3.14E-08     | 3.21E-08     | <  | 4   | 2  | 2  |
| U000HTU_A10 | HTU | A10 | 3.16E-05     | 3.00E-05     | 3.29E-07 | 9.07E-07     | 1.88E-06     | =  | 4.3 | 2  | 2  |
| U000HTV_A1  | HTV | A1  | 8.08E-06     | 6.04E-06     | 2.54E-06 | 2.36E-06     | 2.28E-06     | =  | 4.3 | 2  | 2  |
| U000HTV_A2  | HTV | A2  | 1.39E-05     | 1.08E-05     | 2.06E-07 | 3.99E-07     | 6.08E-07     | <  | 4   | 4  | 4  |
| U000HTV_A3  | HTV | A3  | 1.34E-05     | 1.45E-05     | 1.93E-07 | 1.22E-06     | 2.08E-06     | ND | ND  | ND | ND |
| U000HTV_A4  | HTV | A4  | 1.05E-05     | 2.92E-05     | 6.38E-07 | 4.52E-08     | 5.43E-08     | <  | 3.9 | 2  | 2  |
| U000HTV_A5  | HTV | A5  | NE           | NE           | 1.38E-07 | NE           | NE           | <  | 4   | 2  | 2  |
| U000HTV_A6  | HTV | A6  | 3.71E-05     | 3.52E-05     | 6.63E-07 | 2.46E-06     | 1.70E-06     | =  | 4.3 | 1  | 2  |
| U000HTV_A7  | HTV | A7  | 2.20E-05     | 1.48E-05     | 1.79E-06 | 6.76E-08     | 8.55E-08     | <  | 4   | 2  | 2  |
| U000HTV_A8  | HTV | A8  | 5.09E-05     | 3.73E-05     | 7.42E-07 | 4.96E-06     | 6.23E-06     | =  | 4.4 | 1  | 2  |
| U000HTV_A9  | HTV | A9  | low activity | NE           | 5.46E-07 | 1.56E-06     | 2.75E-06     | =  | 4   | 1  | 2  |

|             |     |     |          |              |          |          |          |   |     |   |   |
|-------------|-----|-----|----------|--------------|----------|----------|----------|---|-----|---|---|
| U000HTV_A10 | HTV | A10 | 1.73E-05 | NE           | 3.23E-07 | 3.02E-08 | 2.84E-08 | < | 4   | 2 | 2 |
| U000HTW_A1  | HTW | A1  | 2.68E-05 | 3.21E-05     | 1.37E-06 | 2.32E-06 | 3.69E-06 | < | 4   | 2 | 2 |
| U000HTW_A2  | HTW | A2  | 2.78E-05 | 1.83E-05     | 9.99E-07 | 5.74E-07 | 9.91E-07 | < | 4   | 2 | 2 |
| U000HTW_A3  | HTW | A3  | 4.64E-06 | 2.91E-06     | 8.25E-07 | 1.74E-07 | 2.32E-07 | = | 4.6 | 1 | 2 |
| U000HTW_A4  | HTW | A4  | 8.74E-06 | 7.78E-06     | 4.49E-07 | 1.86E-06 | 2.06E-06 | = | 4.4 | 1 | 2 |
| U000HTW_A5  | HTW | A5  | 1.75E-05 | 1.78E-05     | 5.80E-07 | 1.55E-06 | 2.08E-06 | < | 4   | 4 | 4 |
| U000HTW_A6  | HTW | A6  | 4.28E-05 | 4.48E-05     | 2.82E-07 | 2.21E-06 | 4.36E-06 | < | 4   | 2 | 2 |
| U000HTW_A7  | HTW | A7  | 2.17E-05 | 1.48E-05     | 5.73E-07 | 5.91E-08 | 8.41E-08 | < | 4   | 2 | 2 |
| U000HTW_A8  | HTW | A8  | 2.79E-05 | 2.45E-05     | 5.32E-07 | 2.54E-06 | 6.64E-06 | = | 4.5 | 2 | 2 |
| U000HTW_A9  | HTW | A9  | 3.51E-05 | 3.79E-05     | 3.20E-07 | 3.70E-08 | 8.11E-08 | = | 4.1 | 3 | 6 |
| U000HTW_A10 | HTW | A10 | 1.87E-05 | 5.32E-05     | 2.08E-06 | 3.02E-08 | 3.98E-08 | = | 4.2 | 1 | 2 |
| U000HU7_A1  | HU7 | A1  | 3.81E-05 | low activity | 2.57E-07 | 3.45E-08 | 2.90E-08 | < | 4   | 2 | 2 |
| U000HU7_A2  | HU7 | A2  | 4.63E-05 | 7.51E-05     | 7.49E-08 | 5.74E-06 | 4.15E-06 | < | 4   | 2 | 2 |
| U000HU7_A3  | HU7 | A3  | 4.33E-06 | 1.76E-05     | 8.38E-08 | 3.59E-08 | 3.25E-08 | = | 4.4 | 2 | 2 |
| U000HU7_A4  | HU7 | A4  | 2.21E-05 | low activity | 2.19E-07 | 4.30E-08 | 4.08E-08 | = | 4.1 | 1 | 2 |
| U000HU7_A5  | HU7 | A5  | 8.15E-05 | low activity | 3.26E-07 | 5.73E-08 | 3.84E-08 | < | 4   | 2 | 2 |
| U000HU7_A6  | HU7 | A6  | 6.15E-05 | low activity | 2.24E-07 | 6.53E-08 | 2.83E-08 | < | 4   | 2 | 2 |
| U000HU7_A7  | HU7 | A7  | 3.27E-05 | 3.47E-05     | 3.73E-07 | 5.31E-08 | 4.69E-08 | < | 4   | 2 | 2 |
| U000HU7_A8  | HU7 | A8  | NE       | NE           | 1.86E-06 | 6.13E-08 | 6.43E-08 | < | 4   | 2 | 2 |
| U000HU7_A9  | HU7 | A9  | 3.05E-05 | low activity | 2.57E-07 | 5.05E-08 | 6.19E-08 | < | 4   | 2 | 2 |
| U000HU7_A10 | HU7 | A10 | 2.38E-06 | low activity | 4.61E-07 | 3.47E-08 | 3.86E-08 | < | 4   | 2 | 2 |

#### NOTES

NE, no effect up to maximum concentration tested

Low activity, effect at highest concentration tested, but insufficient data to calculate IC50 value

ND, not determined

HepG2 data were extracted fresh from corporate database on 6/15/18.

**Supplementary Table S3.**  $XC_{50}$  values for various assays performed on 123 compounds (Wave 2) that were identified by GSK chemists during hit expansion.

| GSK Blinded Identifier | IC50 for inhibition of     |                                  |                                                                   |                                                                      |                                                               |
|------------------------|----------------------------|----------------------------------|-------------------------------------------------------------------|----------------------------------------------------------------------|---------------------------------------------------------------|
|                        | IC50 48 hr                 | IC50 48hr                        | IC50 for inhibition of                                            | 50 nM [3H]adenosine                                                  | IC50 for inhibition of                                        |
|                        | 3D7 parasite viability (M) | PfENT1-KO parasite viability (M) | adenosine-dependent growth of ade2Δ + PfENT1-expressing yeast (M) | uptake into ade2Δ + PfENT1-expressing yeast, 15-min uptake assay (M) | into ade2Δ + PfENT1-expressing yeast, 15-min uptake assay (M) |
|                        | N=3                        | N=2                              | N=1                                                               | N=1                                                                  | N=1                                                           |
| U001RV1_A1             | 8.88E-06                   | 1.08E-05                         | 5.32E-06                                                          | 2.59E-06                                                             | 6.16E-06                                                      |
| U001RV1_A2             | 1.19E-05                   | 3.87E-05                         | 5.80E-07                                                          | 1.91E-07                                                             | 1.29E-07                                                      |
| U001RV1_A3             | 2.24E-05                   | 3.25E-05                         | 4.99E-07                                                          | 1.29E-07                                                             | 6.27E-08                                                      |
| U001RV1_A4             | 2.82E-05                   | 1.02E-04                         | 1.53E-06                                                          | 1.61E-07                                                             | 1.33E-07                                                      |
| U001RV1_A5             | 1.77E-05                   | 6.26E-05                         | 6.11E-07                                                          | 8.63E-08                                                             | 6.15E-08                                                      |
| U001RV1_A6             | 1.23E-05                   | 1.45E-05                         | 4.05E-06                                                          | 1.24E-06                                                             | 1.31E-06                                                      |
| U001RV1_A7             | 2.04E-05                   | 4.61E-05                         | 6.88E-07                                                          | 8.35E-08                                                             | 6.74E-08                                                      |
| U001RV1_A8             | 1.75E-05                   | NE                               | 3.31E-05                                                          | 2.63E-06                                                             | 5.03E-06                                                      |
| U001RV1_A9             | 2.18E-05                   | 3.52E-05                         | 1.03E-05                                                          | 1.04E-05                                                             | 2.89E-05                                                      |
| U001RV1_A10            | 2.83E-06                   | NE                               | 2.26E-05                                                          | 1.09E-06                                                             | 2.10E-06                                                      |
| U001RV2_A1             | 2.83E-05                   | 8.40E-05                         | 1.16E-06                                                          | 1.58E-07                                                             | 6.45E-08                                                      |
| U001RV2_A2             | 2.03E-05                   | 6.17E-05                         | 1.22E-06                                                          | 1.30E-06                                                             | 3.40E-06                                                      |
| U001RV2_A3             | NE                         | 1.61E-03                         | 1.40E-06                                                          | 1.74E-05                                                             | 2.52E-05                                                      |
| U001RV2_A4             | 3.19E-05                   | 5.49E-05                         | 9.23E-07                                                          | 2.20E-07                                                             | 2.77E-07                                                      |
| U001RV2_A5             | NE                         | low activity                     | 1.82E-06                                                          | 2.42E-05                                                             | 2.44E-05                                                      |
| U001RV2_A6             | 2.51E-05                   | 7.53E-05                         | 3.97E-07                                                          | 1.33E-07                                                             | 1.23E-07                                                      |
| U001RV2_A7             | NE                         | low activity                     | 5.06E-08                                                          | 6.48E-07                                                             | 1.49E-06                                                      |
| U001RV2_A8             | NE                         | low activity                     | 1.04E-06                                                          | 6.43E-06                                                             | 1.21E-05                                                      |
| U001RV2_A9             | 6.27E-06                   | 6.78E-06                         | 9.41E-07                                                          | 1.41E-07                                                             | 1.32E-07                                                      |
| U001RV2_A10            | 1.92E-05                   | 2.78E-04                         | NE                                                                | NE                                                                   | NE                                                            |
| U001RXG_A1             | 1.51E-04                   | 4.19E-03                         | 6.09E-06                                                          | 2.18E-06                                                             | 3.15E-06                                                      |
| U001RXG_A2             | 5.96E-05                   | 6.90E-05                         | 7.67E-07                                                          | 1.43E-07                                                             | 4.13E-08                                                      |
| U001RXG_A3             | 5.71E-05                   | 6.60E-05                         | 2.01E-06                                                          | 1.48E-07                                                             | 8.92E-08                                                      |
| U001RXG_A4             | 1.84E-05                   | 5.50E-05                         | 1.80E-06                                                          | 1.26E-07                                                             | 6.13E-08                                                      |
| U001RXG_A5             | 3.38E-05                   | 3.06E-05                         | 5.51E-08                                                          | 8.09E-08                                                             | 1.43E-08                                                      |
| U001RXG_A6             | NE                         | NE                               | 1.78E-06                                                          | 2.30E-06                                                             | 2.94E-06                                                      |
| U001RXG_A7             | NE                         | NE                               | 8.93E-06                                                          | 3.50E-06                                                             | 7.01E-06                                                      |
| U001RXG_A8             | NE                         | NE                               | 1.96E-06                                                          | 1.08E-07                                                             | 4.47E-08                                                      |
| U001RXG_A9             | 3.76E-05                   | 7.11E-05                         | 3.47E-06                                                          | NE                                                                   | NE                                                            |
| U001RXG_A10            | 2.95E-05                   | 6.61E-05                         | 2.76E-06                                                          | NE                                                                   | NE                                                            |
| U001RXH_A1             | NE                         | NE                               | 1.82E-06                                                          | 7.71E-06                                                             | 1.76E-05                                                      |
| U001RXH_A2             | NE                         | NE                               | 4.31E-06                                                          | 3.85E-06                                                             | 5.37E-06                                                      |
| U001RXH_A3             | 2.69E-05                   | 1.57E-02                         | 4.46E-06                                                          | 1.68E-07                                                             | 3.22E-07                                                      |
| U001RXH_A4             | NE                         | NE                               | 6.40E-06                                                          | 9.54E-08                                                             | 1.21E-07                                                      |
| U001RXH_A5             | 3.06E-05                   | 3.99E-05                         | 2.91E-06                                                          | NE                                                                   | NE                                                            |
| U001RXH_A6             | 8.10E-06                   | 9.31E-06                         | 6.83E-07                                                          | NE                                                                   | NE                                                            |
| U001RXH_A7             | 4.57E-05                   | 2.10E-04                         | 5.01E-06                                                          | NE                                                                   | NE                                                            |
| U001RXH_A8             | 4.79E-05                   | NE                               | 6.12E-06                                                          | 3.95E-07                                                             | 6.43E-07                                                      |
| U001RXH_A9             | NE                         | 3.12E-05                         | 2.02E-05                                                          | 1.26E-06                                                             | 1.38E-06                                                      |

|             |              |              |          |          |          |
|-------------|--------------|--------------|----------|----------|----------|
| U001RXH_A10 | 4.36E-05     | 6.59E-05     | 1.71E-06 | 1.77E-07 | 2.29E-07 |
| U001RXJ_A1  | 4.33E-05     | 7.16E-05     | 2.17E-06 | 2.17E-07 | 3.80E-07 |
| U001RXJ_A2  | 4.12E-05     | 4.68E-05     | 1.40E-06 | 2.05E-05 | 1.26E-05 |
| U001RXJ_A3  | 3.26E-05     | low activity | 1.53E-06 | 1.81E-07 | 2.73E-07 |
| U001RXJ_A4  | 7.26E-05     | NE           | 3.42E-07 | 1.19E-07 | 1.11E-07 |
| U001RXJ_A5  | low activity | low activity | 7.21E-06 | NE       | NE       |
| U001RXJ_A6  | 1.61E-05     | 1.93E-05     | 9.74E-07 | 9.29E-06 | 1.38E-05 |
| U001RXJ_A7  | 4.14E-05     | 5.04E-05     | 2.35E-06 | 2.50E-07 | 3.55E-07 |
| U001RXJ_A8  | 7.91E-06     | 1.12E-05     | 1.11E-06 | 7.15E-07 | 6.08E-07 |
| U001RXJ_A9  | NE           | NE           | 1.13E-05 | NE       | NE       |
| U001RXJ_A10 | NE           | low activity | 2.09E-05 | NE       | NE       |
| U001RXK_A1  | 3.50E-05     | 1.08E-04     | 4.77E-06 | 2.45E-05 | 2.74E-05 |
| U001RXK_A2  | 2.87E-05     | 5.82E-05     | 1.26E-06 | 1.95E-07 | 3.03E-07 |
| U001RXK_A3  | 3.21E-05     | 8.97E-05     | 8.86E-07 | 1.10E-07 | 1.41E-07 |
| U001RXK_A4  | 3.33E-05     | 1.05E-04     | 1.24E-06 | 1.08E-07 | 1.58E-07 |
| U001RXK_A5  | 5.14E-04     | NE           | 9.14E-07 | 1.65E-07 | 1.61E-07 |
| U001RXK_A6  | 1.43E-05     | 2.48E-04     | 4.06E-07 | 8.39E-08 | 9.44E-08 |
| U001RXK_A7  | 9.97E-06     | 2.09E-05     | 7.89E-07 | 4.39E-07 | 5.25E-07 |
| U001RXK_A8  | low activity | 4.63E-05     | 1.23E-06 | 8.21E-06 | 9.86E-06 |
| U001RXK_A9  | NE           | NE           | 2.69E-06 | 2.31E-07 | 4.36E-07 |
| U001RXK_A10 | 4.60E-05     | 1.02E-04     | 1.80E-06 | 1.57E-07 | 2.09E-07 |
| U001RUY_A1  | 2.66E-05     | 7.50E-05     | 6.95E-06 | 2.20E-07 | 1.50E-07 |
| U001RUY_A2  | 2.59E-05     | 1.27E-04     | 1.73E-06 | NE       | NE       |
| U001RUY_A3  | 2.78E-05     | 1.71E-04     | 1.56E-06 | NE       | NE       |
| U001RUY_A4  | 2.85E-05     | NE           | 4.49E-06 | 1.44E-05 | 2.19E-05 |
| U001RUY_A5  | low activity | low activity | 8.47E-07 | 1.73E-05 | 2.02E-05 |
| U001RUY_A6  | 3.85E-05     | low activity | 1.54E-06 | 2.72E-05 | 2.40E-05 |
| U001RUY_A7  | 2.71E-05     | 6.56E-05     | 1.54E-06 | 1.96E-06 | 3.41E-06 |
| U001RUY_A8  | 1.19E-05     | 2.71E-05     | 4.45E-07 | 2.75E-07 | 1.71E-07 |
| U001RUY_A9  | 6.59E-06     | 2.35E-05     | 7.43E-07 | 2.18E-07 | 1.74E-07 |
| U001RUY_A10 | NE           | NE           | 2.25E-06 | 3.48E-06 | 9.78E-06 |
| U001RUZ_A1  | 2.61E-05     | 3.27E-05     | 8.96E-07 | 3.06E-07 | 2.41E-07 |
| U001RUZ_A2  | 1.22E-05     | low activity | 2.93E-07 | 1.43E-07 | 1.08E-07 |
| U001RUZ_A3  | 2.98E-05     | 1.21E-04     | 1.79E-06 | 1.04E-06 | 4.54E-06 |
| U001RUZ_A4  | 5.38E-06     | NE           | 1.01E-06 | 3.22E-06 | 6.06E-06 |
| U001RUZ_A5  | 1.63E-05     | 2.39E-05     | 6.43E-07 | 1.69E-07 | 1.04E-07 |
| U001RUZ_A6  | 4.62E-06     | low activity | 2.04E-07 | 1.80E-05 | 2.43E-05 |
| U001RUZ_A7  | 8.64E-06     | 1.19E-04     | 7.73E-07 | 1.26E-07 | 1.01E-07 |
| U001RUZ_A8  | 2.14E-05     | low activity | 1.73E-05 | NE       | NE       |
| U001RUZ_A9  | 2.52E-05     | 7.95E-05     | 2.41E-06 | NE       | NE       |
| U001RUZ_A10 | low activity | 3.48E-05     | 3.63E-06 | 1.80E-07 | 1.53E-07 |
| U001RV0_A1  | low activity | low activity | 1.05E-06 | 1.30E-07 | 7.72E-08 |
| U001RV0_A2  | low activity | low activity | 1.00E-06 | 1.39E-07 | 1.09E-07 |
| U001RV0_A3  | 3.01E-05     | 3.45E-05     | 1.33E-06 | 2.23E-07 | 2.53E-07 |
| U001RV0_A4  | NE           | NE           | 1.43E-06 | 2.04E-07 | 1.65E-07 |
| U001RV0_A5  | 8.72E-06     | 8.96E-06     | 1.00E-06 | 7.89E-06 | 8.32E-06 |
| U001RV0_A6  | low activity | NE           | 7.14E-07 | 2.79E-05 | 2.75E-05 |

|             |              |              |          |          |          |
|-------------|--------------|--------------|----------|----------|----------|
| U001RV0_A7  | 2.23E-05     | 3.24E-05     | 2.31E-06 | 1.12E-07 | 9.72E-08 |
| U001RV0_A8  | 1.72E-05     | 1.68E-05     | 8.44E-07 | 3.11E-06 | 1.32E-05 |
| U001RV0_A9  | low activity | 3.74E-04     | 1.36E-06 | 1.19E-07 | 8.01E-08 |
| U001RV0_A10 | 4.06E-05     | 7.27E-05     | 2.66E-06 | 1.40E-07 | 1.59E-07 |
| U001RXB_A1  | NE           | NE           | 2.93E-06 | 4.40E-06 | 1.17E-05 |
| U001RXB_A2  | 3.49E-05     | 7.03E-05     | 1.58E-06 | 2.05E-07 | 1.72E-07 |
| U001RXB_A3  | 1.30E-05     | NE           | 9.88E-07 | 1.60E-07 | 1.05E-07 |
| U001RXB_A4  | 1.96E-05     | 2.41E-05     | 2.01E-06 | 2.66E-07 | 2.92E-07 |
| U001RXB_A5  | 2.73E-05     | 4.82E-05     | 3.51E-06 | 1.69E-05 | 2.80E-05 |
| U001RXB_A6  | 2.62E-05     | 4.05E-01     | 2.00E-06 | 1.55E-07 | 4.51E-08 |
| U001RXB_A7  | NE           | NE           | 2.62E-06 | 2.17E-06 | 6.07E-06 |
| U001RXB_A8  | 2.11E-05     | 1.35E-04     | 9.95E-07 | 1.35E-07 | 5.83E-08 |
| U001RXB_A9  | 2.21E-05     | 8.70E-05     | 3.89E-06 | 2.01E-07 | 2.64E-07 |
| U001RXB_A10 | 2.71E-05     | 3.66E-05     | 7.96E-07 | 1.66E-07 | 9.59E-08 |
| U001RXI_A1  | NE           | NE           | 1.99E-05 | 2.73E-05 | 2.59E-05 |
| U001RXI_A2  | NE           | NE           | 2.99E-06 | 2.61E-06 | 3.75E-06 |
| U001RXI_A3  | NE           | NE           | 1.41E-06 | NE       | NE       |
| U001RXI_A4  | low activity | 1.27E-03     | 4.15E-06 | NE       | NE       |
| U001RXI_A5  | NE           | NE           | 3.38E-06 | 5.13E-06 | 7.03E-06 |
| U001RXI_A6  | NE           | NE           | 3.55E-06 | NE       | NE       |
| U001RXI_A7  | 6.90E-06     | 2.25E-05     | 9.52E-07 | 4.50E-07 | 4.70E-07 |
| U001RXI_A8  | NE           | 1.06E-04     | 1.53E-06 | 1.89E-07 | 1.93E-07 |
| U001RXI_A9  | NE           | NE           | 5.18E-06 | NE       | NE       |
| U001RXI_A10 | 4.82E-05     | low activity | 1.86E-06 | NE       | NE       |
| U001RXL_A1  | NE           | NE           | NE       | NE       | NE       |
| U001RXL_A2  | 6.86E-05     | 1.40E-04     | NE       | NE       | NE       |
| U001RXL_A3  | NE           | NE           | NE       | NE       | NE       |
| U001RXU_A1  | 3.55E-05     | 1.93E-05     | 6.33E-06 | 1.19E-05 | 1.75E-05 |
| U001RXU_A2  | NE           | NE           | 2.88E-06 | NE       | NE       |
| U001RXU_A3  | NE           | low activity | 4.82E-06 | NE       | NE       |
| U001RXU_A4  | NE           | low activity | 3.66E-06 | 9.24E-06 | 8.60E-06 |
| U001RXU_A5  | 3.17E-06     | 9.82E-06     | 4.07E-07 | 6.60E-07 | 3.89E-07 |
| U001RXU_A6  | NE           | low activity | 9.65E-07 | NE       | NE       |
| U001RXU_A7  | 1.29E-05     | 9.66E-06     | 4.64E-07 | 1.55E-07 | 1.39E-07 |
| U001RXU_A8  | 3.18E-06     | 9.47E-06     | 5.26E-08 | 9.46E-08 | 7.86E-08 |
| U001RXU_A9  | 9.09E-06     | NE           | 3.23E-06 | 1.80E-07 | 1.98E-07 |
| U001RXU_A10 | 1.41E-05     | 2.22E-05     | 6.01E-07 | 1.89E-07 | 2.31E-07 |

#### NOTES

NE, no effect up to maximum concentration tested

Low activity, effect at highest concentration tested, but insufficient data to calculate IC50 value

**A**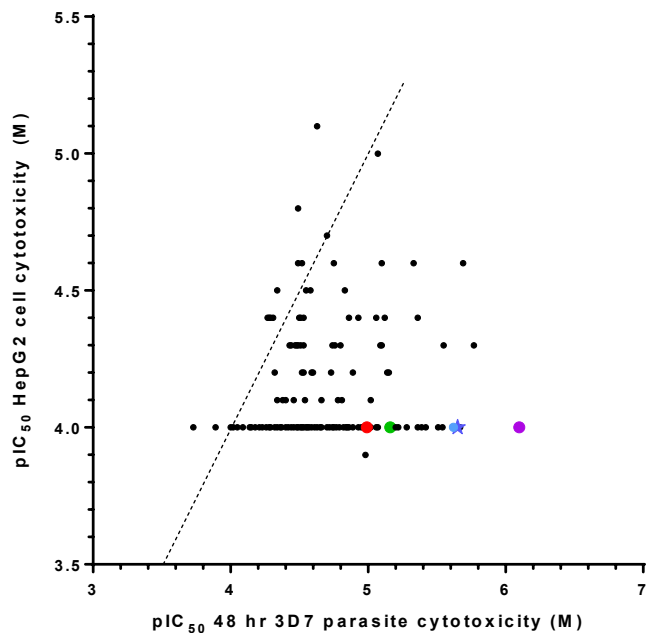**B**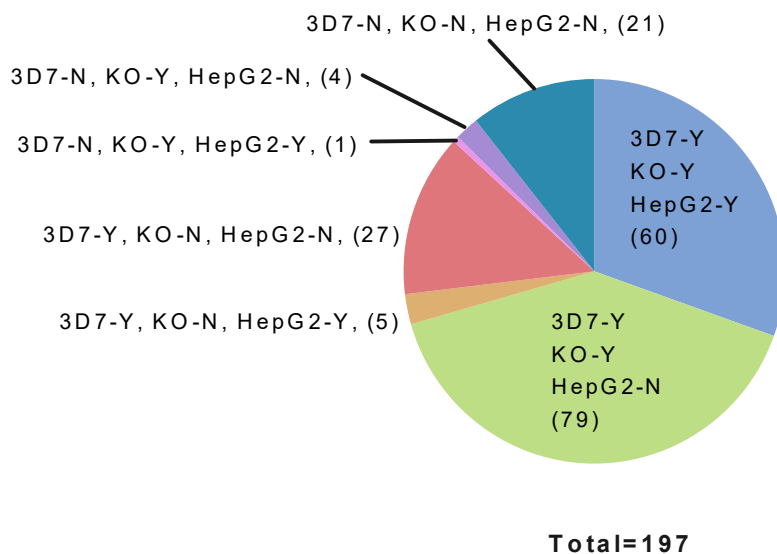

**Supplementary Figure S1.** Comparison of cytotoxicity of the 201 HTS hits for parasites and HepG2 cells. **(A)** For each of the 201 HTS hits, the  $pIC_{50}$  value for inhibition human hepatoma HepG2 cell growth (y-axis) is plotted as a function of the  $pIC_{50}$  value for inhibition of wild-type 3D7 strain *P. falciparum* parasites proliferation (x-axis). Compounds for which there was no effect at the highest concentration tested in the HepG2 assay, 100  $\mu$ M, are plotted at  $pIC_{50} = 4$ .

The colored symbols identify five of the six extensively characterized compounds GSK-1 (purple), GSK-2 (dark blue), GSK-3 (light blue), GSK-4 (green), GSK-5 (orange), GSK-6 (red). The symbol for GSK-2 is a star to differentiate it from GSK-3. GSK-5 was identified during hit expansion and HepG2 cytotoxicity was not determined. **(B)** Pie chart showing the number of compounds that were (Y) or were not (N) cytotoxic for WT 3D7 parasites, *pfent1Δ* (KO) parasites, and HepG2 cells. The number of compounds in each group is indicated in parentheses. Cytotoxicity was not determined in one of the three assays for four compounds, which are excluded from the analysis.



### 3D7 Parasite vs Yeast Kill Assay IC<sub>50</sub> Values

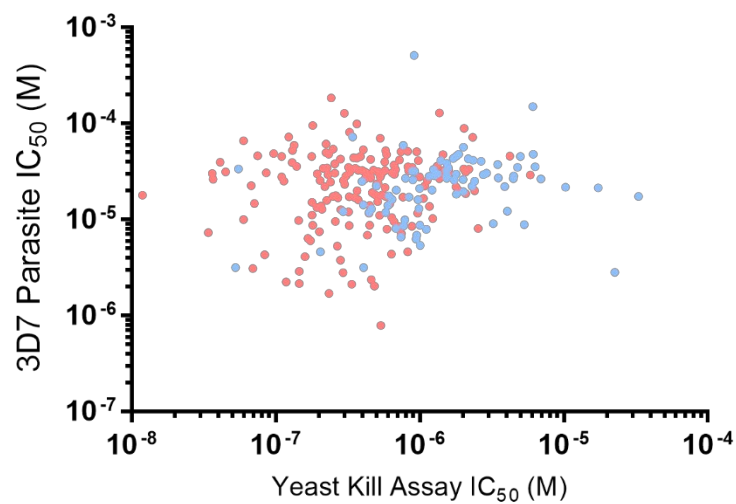

**Supplementary Figure S2.** Comparison of IC<sub>50</sub> values in the 3D7 parasite proliferation assay and in the Yeast Kill Assay. Wave 1 compounds, pink symbols. Wave 2 compounds, blue symbols.

## Supplemental Data – <sup>1</sup>H and <sup>13</sup>C NMR data

The structures of all six commercially-available compounds (GSK-1 to GSK-6) were confirmed by <sup>1</sup>H and <sup>13</sup>C NMR using both 1D and 2D methods. <sup>1</sup>H and <sup>13</sup>C NMR data were assigned based on 2D COSY, HSQC, and HMBC correlations (see associated data tables).

### Supplemental Data – GSK-1 NMR spectra

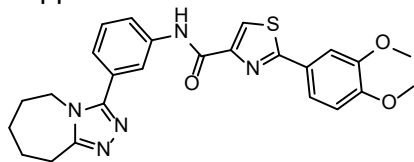

2-(3,4-Dimethoxyphenyl)-N-[3-(6,7,8,9-tetrahydro-5H-[1,2,4]triazolo[4,3-a]azepin-3-yl)phenyl]-1,3-thiazole-4-carboxamide (Enamine cat # Z115045922).

<sup>1</sup>H NMR (DMSO-d<sub>6</sub>, 600 MHz): δ (ppm) 10.43 (s, 1H), 8.43 (s, 1H), 8.11 (s, 1H), 8.01 (d, *J*=8.4 Hz, 1H), 7.73 (d, *J*=1.9 Hz, 1H), 7.66 (d, *J*=8.4 Hz, 1H), 7.56 (t, *J*=7.7 Hz, 1H), 7.31 (d, *J*=7.6 Hz, 1H), 7.11 (d, *J*=8.7 Hz, 1H), 4.04-4.10 (m, 2H), 3.91 (s, 3H), 3.85 (s, 3H), 2.95-3.01 (m, 2H), 1.82-1.87 (m, 2H), 1.75 (br s, 2H), 1.67 (br s, 2H).

<sup>13</sup>C NMR (DMSO-d<sub>6</sub>, 151 MHz): δ (ppm) 167.5, 159.3, 157.5, 153.7, 151.2, 149.9, 149.1, 138.8, 129.3, 127.9, 125.2, 124.8, 124.3, 121.5, 120.9, 120.1, 111.9, 109.8, 55.8, 55.7, 45.1, 29.7, 28.0, 25.9, 25.2.

GSK-1.

Summary table of 1D and 2D NMR data.

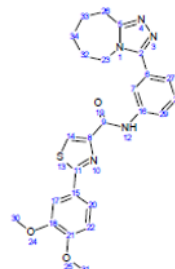

| Atom# | C Shift | H Shift | H Multiplicity | H Volume | COSY       | H MBC                  | C H MBC                        |
|-------|---------|---------|----------------|----------|------------|------------------------|--------------------------------|
| 33    | 25.187  | 1.574   | br s           | -2.058   | 1.85, 2.98 | 2.98                   |                                |
| 26    | 25.903  | 2.984   | m              | -2.414   | 1.87       |                        | 29.74, 157.45, 25.19           |
| 32    | 28.021  | 1.746   | br s           | -2.113   | 1.85, 4.07 | 4.07                   |                                |
| 34    | 29.741  | 1.845   | m              | -2.113   | 1.67, 1.75 | 2.98, 4.07             |                                |
| 23    | 45.131  | 4.072   | m              | -2.173   | 1.75       |                        | 153.72, 157.45, 29.74, 28.02   |
| 31    | 55.697  | 3.846   | s              | 3.131    |            |                        | 111.86, 151.16                 |
| 30    | 55.816  | 3.909   | s              | 2.674    |            |                        | 149.06, 109.77                 |
| 17    | 109.766 | 7.732   | d (1.89)       | 1.023    | 7.66       | 3.91, 7.11, 7.66       | 151.16, 167.48, 120.09, 125.20 |
| 22    | 111.860 | 7.112   | d (8.69)       | 0.975    | 7.66       | 3.85                   | 151.16, 125.20, 167.48, 109.77 |
| 20    | 120.093 | 7.661   | d (8.41)       | 1.023    | 7.11, 7.73 | 7.73                   | 151.16, 167.48, 109.77         |
| 7     | 120.889 | 8.116   | s              | 1.002    |            | 8.01, 10.43            | 138.78, 153.72                 |
| 29    | 121.542 | 8.014   | d (8.36)       | 1.000    | 7.56       | 7.30, 10.43            | 120.89, 124.32                 |
| 27    | 124.321 | 7.302   | d (7.55)       | 0.964    | 7.56       | 8.01                   | 121.54, 153.72                 |
| 14    | 124.782 | 8.430   | s              | 0.835    |            |                        | 159.33, 167.48, 149.90         |
| 15    | 125.204 |         |                |          |            | 7.11, 7.73             |                                |
| 6     | 127.892 |         |                |          |            | 7.56                   |                                |
| 28    | 129.273 | 7.565   | t (7.74, 7.74) | 1.014    | 7.30, 8.01 |                        | 138.78, 127.89                 |
| 16    | 138.779 |         |                |          |            | 7.56, 8.12, 10.43      |                                |
| 18    | 149.062 |         |                |          |            | 3.91                   |                                |
| 8     | 149.902 |         |                |          |            | 8.43                   |                                |
| 21    | 151.164 |         |                |          |            | 3.85, 7.11, 7.66, 7.73 |                                |
| 2     | 153.716 |         |                |          |            | 4.07, 7.30, 8.12       |                                |
| 5     | 157.450 |         |                |          |            | 2.98, 4.07             |                                |

  

|    | C Shift | H Shift | H Multiplicity | H Volume | COSY | H MBC                  | C H MBC                        |
|----|---------|---------|----------------|----------|------|------------------------|--------------------------------|
| 9  | 159.329 |         |                |          |      | 8.43, 10.43            |                                |
| 11 | 167.478 |         |                |          |      | 7.11, 7.66, 7.73, 8.43 |                                |
| 12 |         | 10.432  | s              | 0.930    |      |                        | 121.54, 120.89, 159.33, 138.78 |

# Supplemental Data – GSK-1 NMR spectra

<sup>1</sup>H NMR spectrum for GSK-1

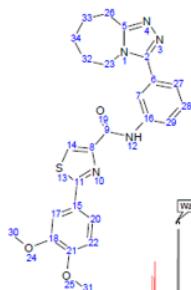

mzw56892 67430  
ST/2459143

Acquisition Time (sec) 2.6477  
Date 15 Mar 2015  
03:47:27  
Nucleus 1H  
Frequency (MHz) 600.1300  
Number of Transients 16  
Origin spect  
Original Points Count 32768  
Points Count 32768  
Pulse Sequence zg30  
Receiver Gain 161.00  
Solvent DMSO-d6  
Spectrum Offset (Hz) 3706.2753  
Sweep Width (Hz) 12379.86  
Temperature (degree C) 25.000

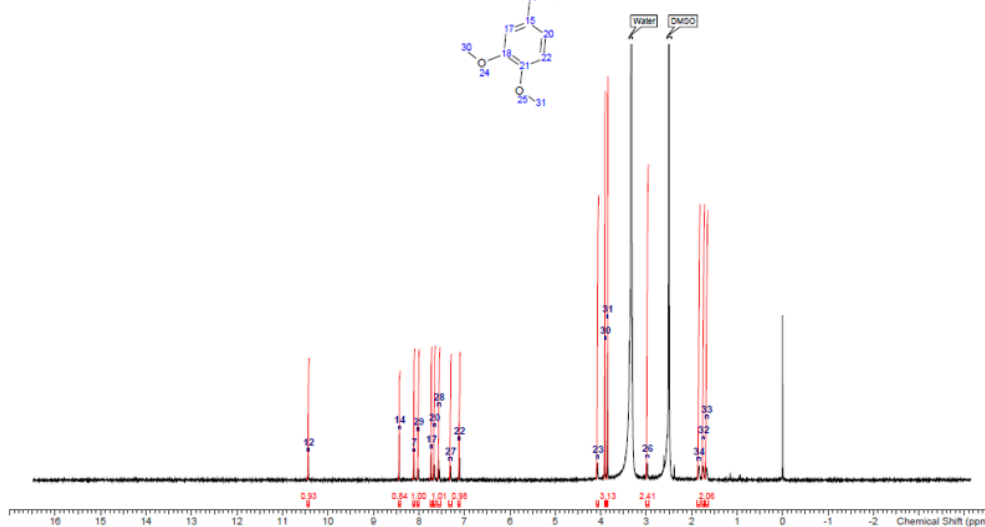

<sup>1</sup>H NMR (DMSO-d<sub>6</sub>, 600MHz):  $\delta$  (ppm) 10.43 (s, 1H), 8.43 (s, 1H), 8.11 (s, 1H), 8.01 (d,  $J=8.4$  Hz, 1H), 7.73 (d,  $J=1.9$  Hz, 1H), 7.66 (d,  $J=8.4$  Hz, 1H), 7.56 (t,  $J=7.7$  Hz, 1H), 7.31 (d,  $J=7.6$  Hz, 1H), 7.11 (d,  $J=8.7$  Hz, 1H), 4.04-4.10 (m, 2H), 3.91 (s, 3H), 3.85 (s, 3H), 2.95-3.01 (m, 2H), 1.82-1.87 (m, 2H), 1.75 (br s, 2H), 1.67 (br s, 2H)

date created: 17 03 2015  
Analytical Chemistry MDR  
Upper Providence

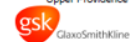

# Supplemental Data – GSK-1 NMR spectra

## <sup>13</sup>C NMR spectrum for GSK-1

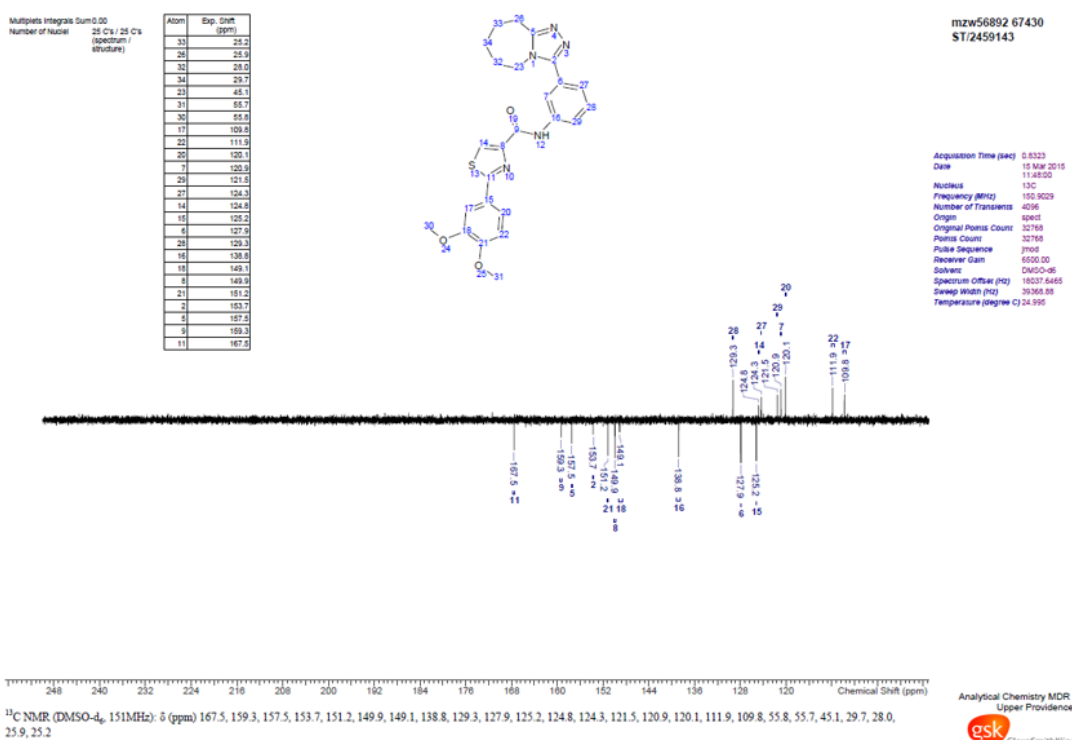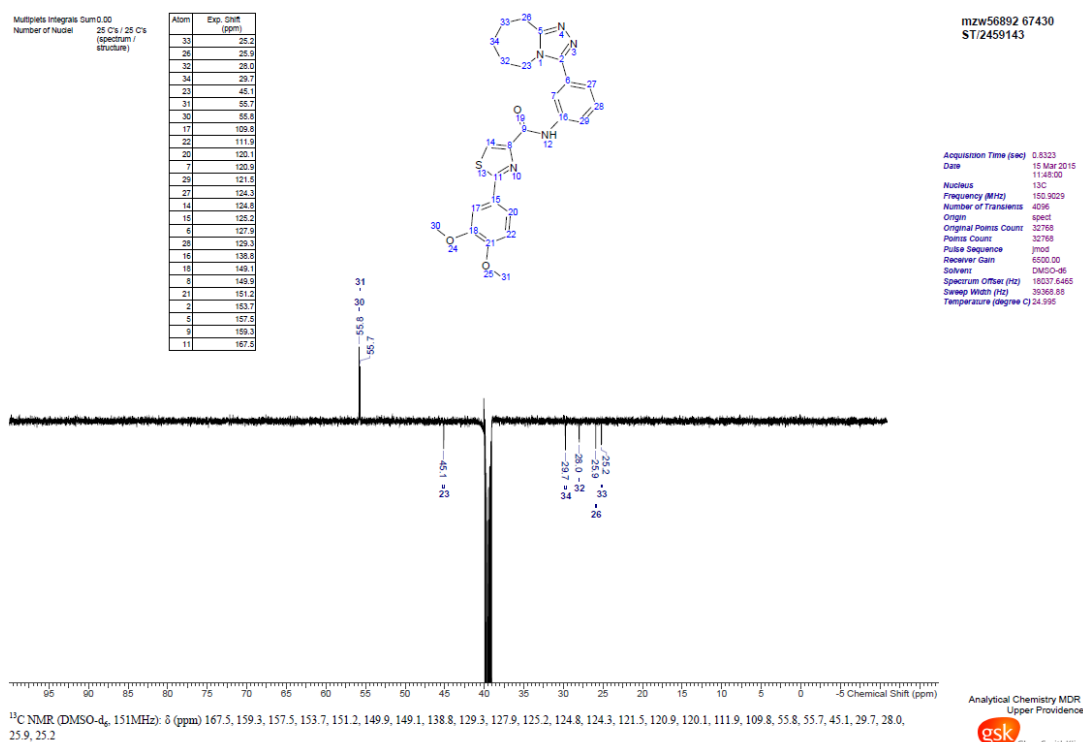

Supplemental Data – GSK-2 NMR spectra

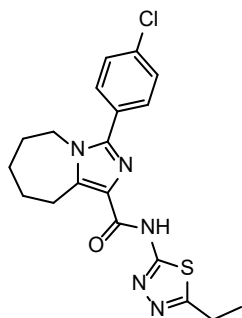

3-(4-Chlorophenyl)-N-(5-ethyl-1,3,4-thiadiazol-2-yl)-6,7,8,9-tetrahydro-5H-imidazo[1,5-a]zepine-1-carboxamide (ChemDiv cat # E711-0141).

$^1\text{H}$  NMR (DMSO- $d_6$ , 600 MHz):  $\delta$  (ppm) 11.46 (br s, 1H), 7.64-7.68 (m, 2H), 7.60-7.64 (m, 2H), 4.05-4.18 (m, 2H), 3.01 (q,  $J=7.6$  Hz, 2H), 1.83 (br s, 2H), 1.75 (br s, 2H), 1.67 (br s, 2H), 1.31 (t,  $J=7.6$  Hz, 3H).

$^{13}\text{C}$  NMR (DMSO- $d_6$ , 151 MHz):  $\delta$  (ppm) 165.2, 144.9, 134.1, 131.1, 128.8, 128.5, 46.8, 30.0, 27.8, 26.1, 23.8, 22.7, 13.9.

GSK-2.

Summary table of 1D and 2D NMR data.

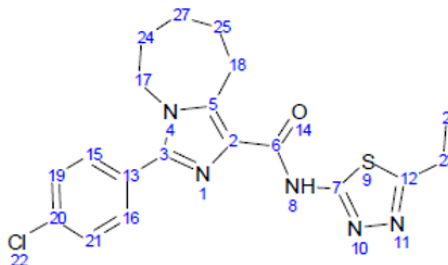

| Atom#  | C Shift | H Shift | H Multiplicity       | H Volume | COSY       | H HMBC     | C HMBC               |
|--------|---------|---------|----------------------|----------|------------|------------|----------------------|
| 26     | 13.865  | 1.312   | t (7.55, 7.55)       | 3.000    | 3.01       | 3.01       | 165.21, 22.69        |
| 23     | 22.686  | 3.007   | q (7.55, 7.55, 7.55) | -2.125   | 1.31       | 1.31       | 165.21, 13.86        |
| 18     | 23.777  | 3.339   | u                    | -121.380 | 1.68       |            |                      |
| 25     | 26.062  | 1.675   | br s                 | -2.022   | 1.84, 3.34 |            |                      |
| 24     | 27.762  | 1.753   | br s                 | -2.117   | 1.84, 4.11 | 4.11       |                      |
| 27     | 29.964  | 1.838   | br s                 | -2.208   | 1.68, 1.75 | 4.11       |                      |
| 17     | 46.787  | 4.113   | m                    | -2.188   | 1.75       |            | 144.91, 27.76, 29.96 |
| 13     | 128.524 |         |                      |          |            | 7.62       |                      |
| 19, 21 | 128.779 | 7.621   | m                    | 2.021    |            |            | 128.52               |
| 15, 16 | 131.088 | 7.660   | m                    | 2.025    |            |            | 144.91, 134.11       |
| 20, 2  | 134.106 |         |                      |          |            | 7.66       |                      |
| 3      | 144.910 |         |                      |          |            | 4.11, 7.66 |                      |
| 12     | 165.205 |         |                      |          |            | 1.31, 3.01 |                      |
| 8      |         | 11.460  | br s                 | 0.865    |            |            |                      |

# Supplemental Data – GSK-2 NMR spectra

## <sup>1</sup>H NMR spectrum for GSK-2

mzw56892 67420  
ST/2459147

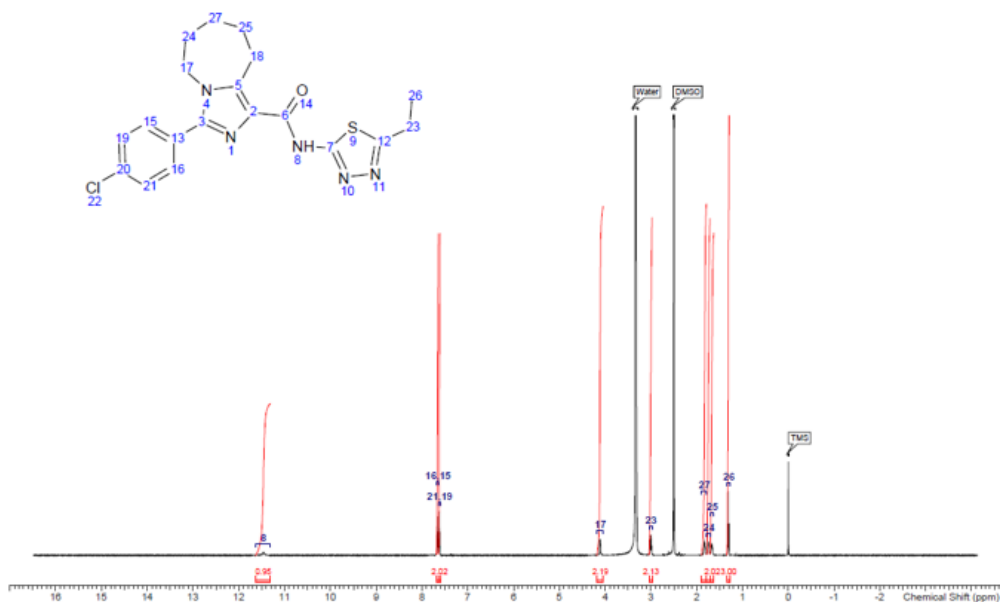

Acquisition Time (sec) 2.5477  
Date 13 Mar 2015  
16:52:46  
Nucleus 1H  
Frequency (MHz) 600.1300  
Number of Transients 16  
Origin spect  
Original Points Count 32768  
Points Count 32768  
Pulse Sequence zgpg30  
Receiver Gain 161.00  
Solvent DMSO-d6  
Spectrum Offset (Hz) 3756.6868  
Sweep Width (Hz) 12375.86  
Temperature (degree C) 24.995

<sup>1</sup>H NMR (DMSO-d<sub>6</sub>, 600MHz): δ (ppm) 11.46 (br s, 1H), 7.64-7.68 (m, 2H), 7.60-7.64 (m, 2H), 4.05-4.18 (m, 2H), 3.01 (q, J=7.6 Hz, 2H), 1.83 (br s, 2H), 1.75 (br s, 2H), 1.67 (br s, 2H), 1.31 (t, J=7.6 Hz, 3H)

date created: 16 03 2015  
Analytical Chemistry MDR  
Upper Providence

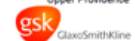

# Supplemental Data – GSK-2 NMR spectra

## <sup>13</sup>C NMR spectrum for GSK-2

Multiplet Integrals Sum 0.00  
Number of Nuclei 15 C's / 19 C's  
(spectrum / structure)

| Atom | Exp. Shift (ppm) |
|------|------------------|
| 26   | 13.9             |
| 23   | 22.7             |
| 18   | 23.8             |
| 25   | 26.1             |
| 24   | 27.8             |
| 27   | 30.0             |
| 17   | 46.8             |
| 13   | 128.5            |
| 21   | 128.8            |
| 19   | 128.8            |
| 16   | 131.1            |
| 15   | 131.1            |
| 2    | 134.1            |
| 3    | 144.9            |
| 12   | 165.2            |

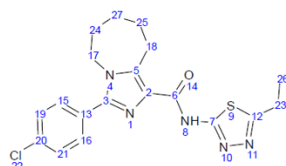

mzw56892 67420  
ST/2459147

Acquisition Time (sec) 0.8323  
Date 14 Mar 2015  
08:01:53  
Nucleus 13C  
Frequency (MHz) 100.6229  
Number of Transients 12288  
Origin spect  
Original Points Count 32768  
Points Count 32768  
Pulse Sequence jmod  
Receiver Gain 4000.00  
Solvent DMSO-d6  
Spectrum Offset (Hz) 18038.8388  
Sweep Width (Hz) 30368.88  
Temperature (degree C) 24.995

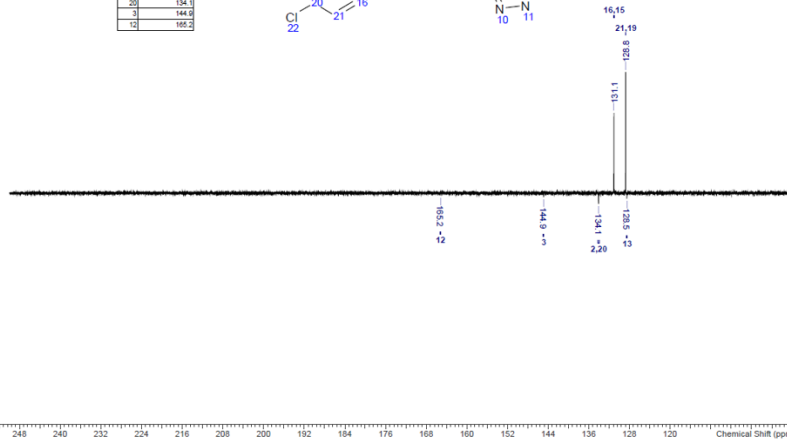

<sup>13</sup>C NMR (DMSO-d<sub>6</sub>, 151MHz): δ (ppm) 165.2, 144.9, 134.1, 131.1, 128.8, 128.5, 46.8, 30.0, 27.8, 26.1, 23.8, 22.7, 13.9

Analytical Chemistry MDR  
Upper Providence  
 GlaxoSmithKline

Multiplet Integrals Sum 0.00  
Number of Nuclei 15 C's / 19 C's  
(spectrum / structure)

| Atom | Exp. Shift (ppm) |
|------|------------------|
| 26   | 13.9             |
| 23   | 22.7             |
| 18   | 23.8             |
| 25   | 26.1             |
| 24   | 27.8             |
| 27   | 30.0             |
| 17   | 46.8             |
| 13   | 128.5            |
| 21   | 128.8            |
| 19   | 128.8            |
| 16   | 131.1            |
| 15   | 131.1            |
| 2    | 134.1            |
| 3    | 144.9            |
| 12   | 165.2            |

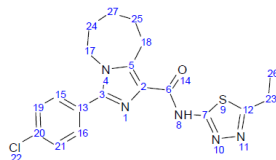

mzw56892 67420  
ST/2459147

Acquisition Time (sec) 0.8323  
Date 14 Mar 2015  
08:01:53  
Nucleus 13C  
Frequency (MHz) 100.6229  
Number of Transients 12288  
Origin spect  
Original Points Count 32768  
Points Count 32768  
Pulse Sequence jmod  
Receiver Gain 4000.00  
Solvent DMSO-d6  
Spectrum Offset (Hz) 18038.8388  
Sweep Width (Hz) 30368.88  
Temperature (degree C) 24.995

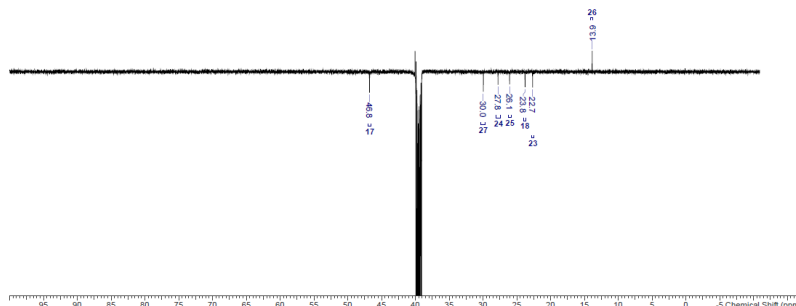

<sup>13</sup>C NMR (DMSO-d<sub>6</sub>, 151MHz): δ (ppm) 165.2, 144.9, 134.1, 131.1, 128.8, 128.5, 46.8, 30.0, 27.8, 26.1, 23.8, 22.7, 13.9

Analytical Chemistry MDR  
Upper Providence  
 GlaxoSmithKline

Supplemental Data – GSK-3 NMR spectra

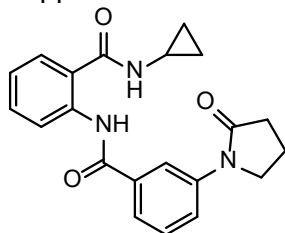

N-Cyclopropyl-2-[[3-(2-oxo-1-pyrrolidinyl)benzoyl]amino]benzamide  
(Enamine cat # Z95754787)

<sup>1</sup>H NMR (DMSO-d<sub>6</sub>, 600 MHz): δ (ppm) 12.54 (s, 1H), 8.79-8.90 (m, 1H), 8.60 (d, *J*=8.3 Hz, 1H), 8.22 (s, 1H), 7.95 (br d, *J*=7.9 Hz, 1H), 7.79 (br d, *J*=7.9 Hz, 1H), 7.67 (br d, *J*=7.6 Hz, 1H), 7.61 (t, *J*=8.3 Hz, 1H), 7.56 (t, *J*=7.2 Hz, 1H), 7.19 (t, *J*=7.6 Hz, 1H), 3.92 (t, *J*=7.2 Hz, 2H), 2.90 (br dd, *J*=7.2, 3.4 Hz, 1H), 2.53-2.57 (m, 2H), 2.11 (quin, *J*=7.5 Hz, 2H), 0.71-0.76 (m, 2H), 0.61-0.65 (m, 2H).

<sup>13</sup>C NMR (DMSO-d<sub>6</sub>, 151 MHz): δ (ppm) 174.2, 170.0, 164.3, 140.2, 139.1, 135.2, 132.2, 129.3, 128.4, 122.8, 122.6, 121.6, 120.3, 120.3, 118.1, 48.0, 32.3, 23.2, 17.4, 5.7.

GSK-3.

Summary table of 1D and 2D NMR data.

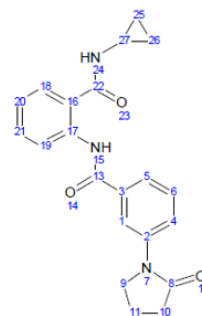

| Atom#  | C Shift | H Shift | H Multiplicity                | H Volume | COSY             | H HMBC                        | C HMBC                         |
|--------|---------|---------|-------------------------------|----------|------------------|-------------------------------|--------------------------------|
| 25, 26 | 5.696   |         |                               |          |                  | 0.73                          |                                |
| 25, 26 | 5.700   | 0.730   | m                             | 2.000    | 2.90             |                               | 23.15, 5.70                    |
| 25, 26 | 5.700   | 0.633   | m                             | 1.900    | 2.90             | 8.84                          | 23.15                          |
| 11     | 17.412  | 2.107   | quin (7.46, 7.46, 7.46, 7.46) | -2.368   | 2.55, 3.92       | 2.55, 3.92                    | 32.33, 174.20, 48.02           |
| 27     | 23.152  | 2.900   | br dd (7.18, 3.40)            | 1.157    | 0.63, 0.73, 8.84 | 0.63, 0.73, 8.84              |                                |
| 10     | 32.332  | 2.552   | m                             | -2.519   | 2.11             | 2.11, 3.92                    | 48.02, 17.41, 174.20           |
| 9      | 48.017  | 3.923   | t (7.18, 7.18)                | -2.095   | 2.11             | 2.11, 2.55                    | 140.18, 174.20, 17.41, 32.33   |
| 1      | 118.122 | 8.218   | s                             | 1.082    |                  | 7.67, 7.94                    | 140.18, 164.28, 121.55         |
| 16     | 120.308 |         |                               |          |                  | 8.60                          |                                |
| 19     | 120.320 | 8.604   | d (8.31)                      | 1.106    | 7.56             | 7.19, 7.56, 7.79, 12.54       | 169.96, 122.84, 120.31, 139.13 |
| 5      | 121.554 | 7.671   | br d (7.55)                   | 1.228    | 7.61             | 7.94, 8.22                    | 164.28, 118.12, 122.57         |
| 4      | 122.573 | 7.944   | br d (7.93)                   | 1.083    | 7.61             | 7.61, 7.67                    | 121.55, 118.12, 140.18         |
| 20     | 122.844 | 7.193   | t (7.55, 7.55)                | 1.116    | 7.56, 7.79       | 8.60                          | 120.32, 128.36, 139.13         |
| 18     | 128.361 | 7.787   | br d (7.93)                   | 1.069    | 7.19             | 7.19, 7.56                    | 132.23, 139.13, 169.96, 120.32 |
| 6      | 129.325 | 7.607   | m                             | 1.204    | 7.67, 7.94       |                               | 164.28, 135.17, 140.18, 122.57 |
| 21     | 132.231 | 7.564   | m                             | 0.974    | 7.19, 8.60       | 7.79, 12.54                   | 139.13, 128.36, 120.32         |
| 3      | 135.173 |         |                               |          |                  | 7.61                          |                                |
| 17     | 139.130 |         |                               |          |                  | 7.19, 7.56, 7.79, 8.60, 12.54 |                                |
| 2      | 140.181 |         |                               |          |                  | 3.92, 7.61, 7.94, 8.22        |                                |
| 13     | 164.282 |         |                               |          |                  | 7.61, 7.67, 8.22, 12.54       |                                |
| 22     | 169.958 |         |                               |          |                  | 7.79, 8.60, 8.84              |                                |
| 8      | 174.202 |         |                               |          |                  | 2.11, 2.55, 3.92              |                                |
| 24     |         | 8.839   | m                             | 1.121    | 2.90             |                               | 169.96, 23.15, 5.70            |
| 15     |         | 12.537  | s                             | 1.056    |                  |                               | 164.28, 132.23, 139.13, 120.32 |



# Supplemental Data – GSK-3 NMR spectra

## <sup>1</sup>H NMR spectrum for GSK-3

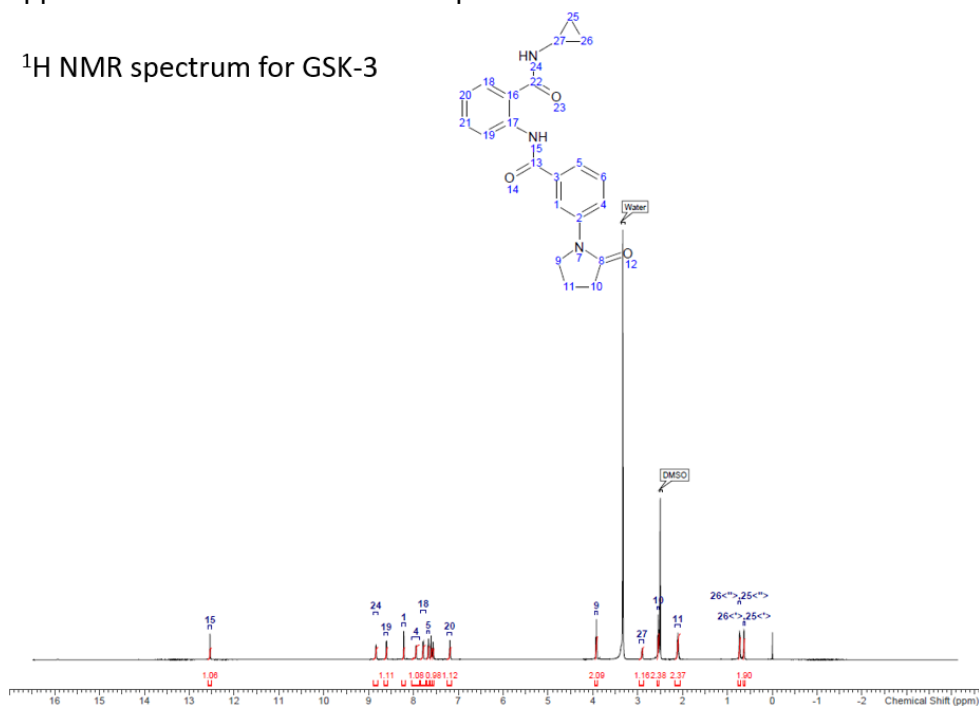

<sup>1</sup>H NMR (DMSO-*d*<sub>6</sub>, 600MHz): δ (ppm) 12.54 (s, 1H), 8.79-8.90 (m, 1H), 8.60 (d, *J*=8.3 Hz, 1H), 8.22 (s, 1H), 7.95 (br d, *J*=7.9 Hz, 1H), 7.79 (br d, *J*=7.9 Hz, 1H), 7.67 (br d, *J*=7.6 Hz, 1H), 7.61 (t, *J*=8.3 Hz, 1H), 7.56 (t, *J*=7.2 Hz, 1H), 7.19 (t, *J*=7.6 Hz, 1H), 3.92 (t, *J*=7.2 Hz, 2H), 2.90 (br dd, *J*=7.2, 3.4 Hz, 1H), 2.53-2.57 (m, 2H), 2.11 (quin, *J*=7.5 Hz, 2H), 0.71-0.76 (m, 2H), 0.61-0.65 (m, 2H)

mzw56892\_67428  
ST/2459144

Acquisition Time (sec) 2.5477  
Date 10 Mar 2015 18:22:14  
Nucleus 1H  
Frequency (MHz) 600.1300  
Number of Transients 16  
Origin spect  
Original Points Count 32768  
Points Count 32768  
Pulse Sequence zg30  
Receiver Gain 161.00  
Solvent DMSO-*d*<sub>6</sub>  
Spectrum Offset (Hz) 3768.6612  
Sweep Width (Hz) 12375.55  
Temperature (degree C) 24.995

date created: 11 03 201  
Analytical Chemistry MDR  
Upper Providence

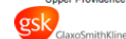

## <sup>13</sup>C NMR spectrum for GSK-3

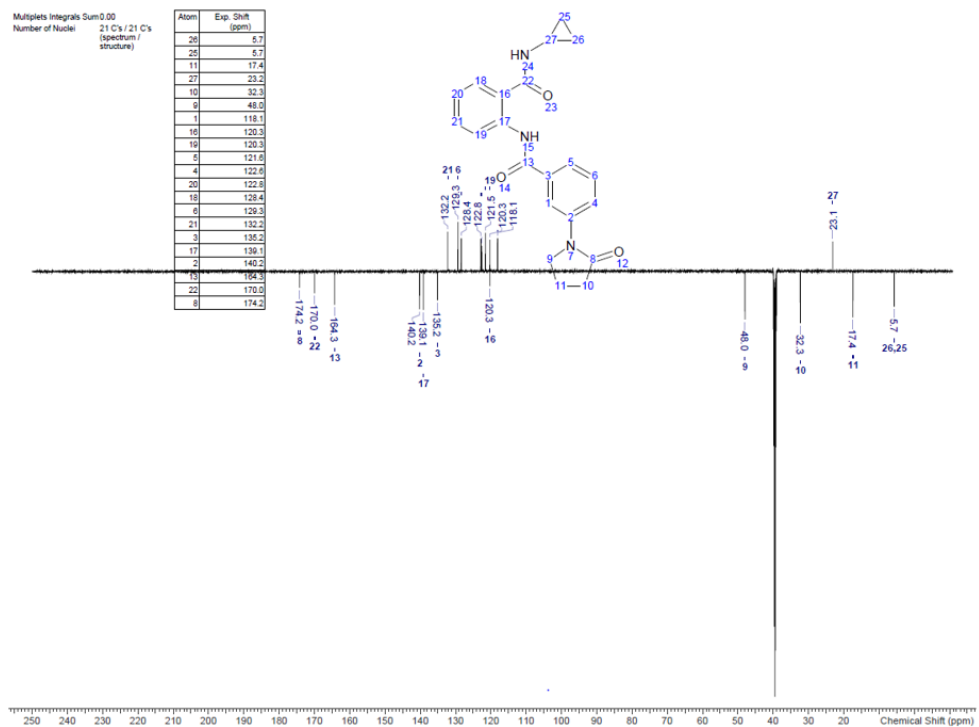

<sup>13</sup>C NMR (DMSO-*d*<sub>6</sub>, 151MHz): δ (ppm) 174.2, 170.0, 164.3, 140.2, 139.1, 135.2, 132.2, 129.3, 128.4, 122.8, 122.6, 121.6, 120.3, 120.3, 118.1, 48.0, 32.3, 23.2, 17.4, 5.7

mzw56892\_67428  
ST/2459144

Acquisition Time (sec) 0.8323  
Date 11 Mar 2015 09:35:55  
Nucleus 13C  
Frequency (MHz) 150.9029  
Number of Transients 1228  
Origin spect  
Original Points Count 32768  
Points Count 32768  
Pulse Sequence jmod  
Receiver Gain 3290.00  
Solvent DMSO-*d*<sub>6</sub>  
Spectrum Offset (Hz) 18038.8598  
Sweep Width (Hz) 30368.88  
Temperature (degree C) 24.995

Analytical Chemistry MDR  
Upper Providence

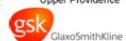

Supplemental Data – GSK-4 NMR spectra

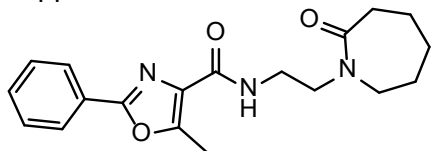

5-Methyl-N-[2-(2-oxo-1-azepanyl)ethyl]-2-phenyl-1,3-oxazole-4-carboxamide  
(Enamine cat # Z407267740)

<sup>1</sup>H NMR (DMSO-d<sub>6</sub>, 600 MHz): δ (ppm) 8.19 (br t, *J*=5.1 Hz, 1H), 7.90-8.05 (m, 2H), 7.48-7.64 (m, 3H), 3.43-3.48 (m, 2H), 3.38-3.41 (m, 2H), 3.35-3.37 (m, 2H), 2.65 (s, 3H), 2.36-2.46 (m, 2H), 1.61-1.68 (m, 2H), 1.57 (br s, 2H), 1.48-1.55 (m, 2H).

<sup>13</sup>C NMR (DMSO-d<sub>6</sub>, 151 MHz): δ (ppm) 175.0, 161.3, 157.8, 152.4, 130.9, 130.2, 129.2, 126.3, 125.9, 49.2, 46.9, 37.2, 36.5, 29.2, 28.2, 23.0, 11.4.

GSK-4.

Summary table of 1D and 2D NMR data.

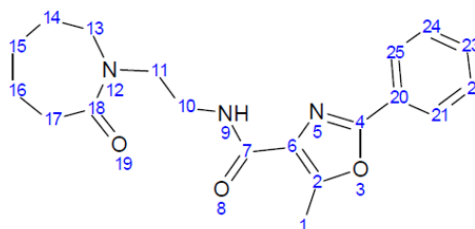

| Atom#  | C Shift | H Shift | H Multiplicity    | H Volume | COSY       | H HMBC                 | C HMBC                     |
|--------|---------|---------|-------------------|----------|------------|------------------------|----------------------------|
| 1      | 11.444  | 2.649   | s                 | 3.000    |            |                        | 130.20, 161.26, 152.43     |
| 16     | 22.965  | 1.536   | m                 | -1.704   | 1.63, 2.41 | 1.57, 1.63, 2.41       | 36.54, 28.24, 174.97       |
| 14     | 28.244  | 1.566   | br s              | -1.653   | 3.40       | 1.54, 1.63             | 49.23, 22.97               |
| 15     | 29.243  | 1.630   | m                 | -1.812   | 1.54       | 2.41, 3.40             | 49.23, 22.97, 36.54, 28.24 |
| 17     | 36.544  | 2.409   | m                 | -1.824   | 1.54       | 1.54, 1.63             | 29.24, 22.97, 174.97       |
| 10     | 37.201  | 3.351   | m                 | -2.213   | 3.46, 8.19 | 3.46, 8.19             | 161.26, 46.95              |
| 11     | 46.946  | 3.459   | m                 | -2.446   | 3.35       | 3.35, 3.40             | 37.20, 49.23, 174.97       |
| 13     | 49.232  | 3.395   | m                 | -2.308   | 1.57       | 1.57, 1.63, 3.46       | 174.97, 46.95, 29.24       |
| 21, 25 | 125.925 | 7.977   | m                 | 1.745    | 7.56       |                        | 130.88, 157.75             |
| 20     | 126.311 |         |                   |          |            | 7.56                   |                            |
| 22, 24 | 129.213 | 7.559   | m                 | 1.767    | 7.98       | 7.55                   | 126.31                     |
| 6      | 130.204 |         |                   |          |            | 2.65                   |                            |
| 23     | 130.877 | 7.555   | m                 | 0.953    |            | 7.98                   | 129.21                     |
| 2      | 152.434 |         |                   |          |            | 2.65                   |                            |
| 4      | 157.753 |         |                   |          |            | 7.98                   |                            |
| 7      | 161.264 |         |                   |          |            | 2.65, 3.35, 8.19       |                            |
| 18     | 174.966 |         |                   |          |            | 1.54, 2.41, 3.40, 3.46 |                            |
| 9      |         | 8.186   | br t (5.10, 5.10) | 0.855    | 3.35       |                        | 37.20, 161.26              |

# Supplemental Data – GSK-4 NMR spectra

## <sup>1</sup>H NMR spectrum for GSK-4

mzw56892 67429  
ST/2459146

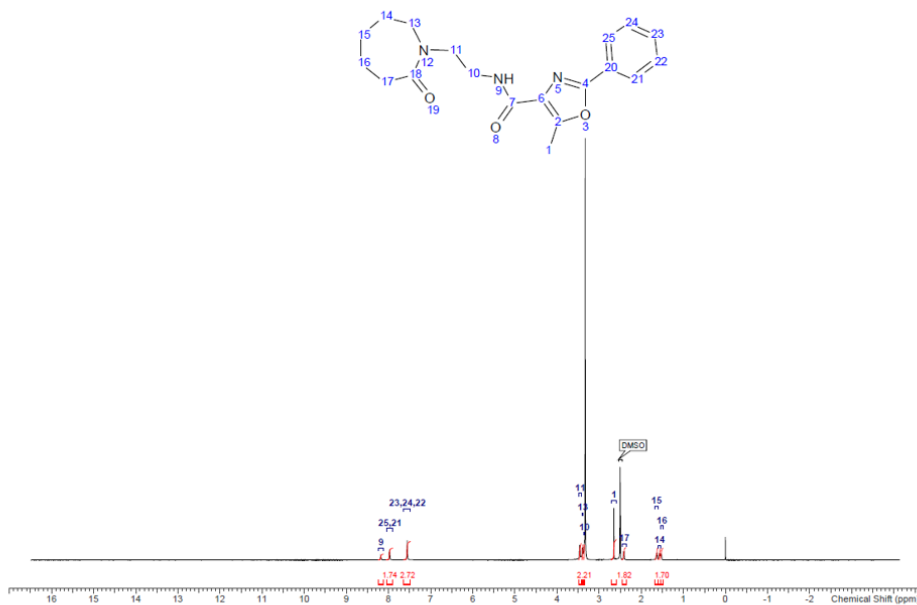

Acquisition Time (sec) 2.6477  
Date 11 Mar 2015  
09:46:40  
Nucleus 1H  
Frequency (MHz) 600.1300  
Number of Transients 16  
Origin spect  
Original Points Count 32768  
Points Count 32768  
Pulse Sequence zg30  
Receiver Gain 161.00  
Solvent DMSO-d6  
Spectrum Offset (Hz) 2709.3145  
Sweep Width (Hz) 12375.96  
Temperature (degree C) 24.905

<sup>1</sup>H NMR (DMSO-d<sub>6</sub>, 600MHz): δ (ppm) 8.19 (br t, *J*=5.1 Hz, 1H), 7.90-8.05 (m, 2H), 7.48-7.64 (m, 3H), 3.43-3.48 (m, 2H), 3.38-3.41 (m, 2H), 3.35-3.37 (m, 2H), 2.65 (s, 3H), 2.36-2.46 (m, 2H), 1.61-1.68 (m, 2H), 1.57 (br s, 2H), 1.48-1.55 (m, 2H)

date created: 12 03 2015  
Analytical Chemistry MDR  
Upper Providence

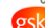

## <sup>13</sup>C NMR spectrum for GSK-4

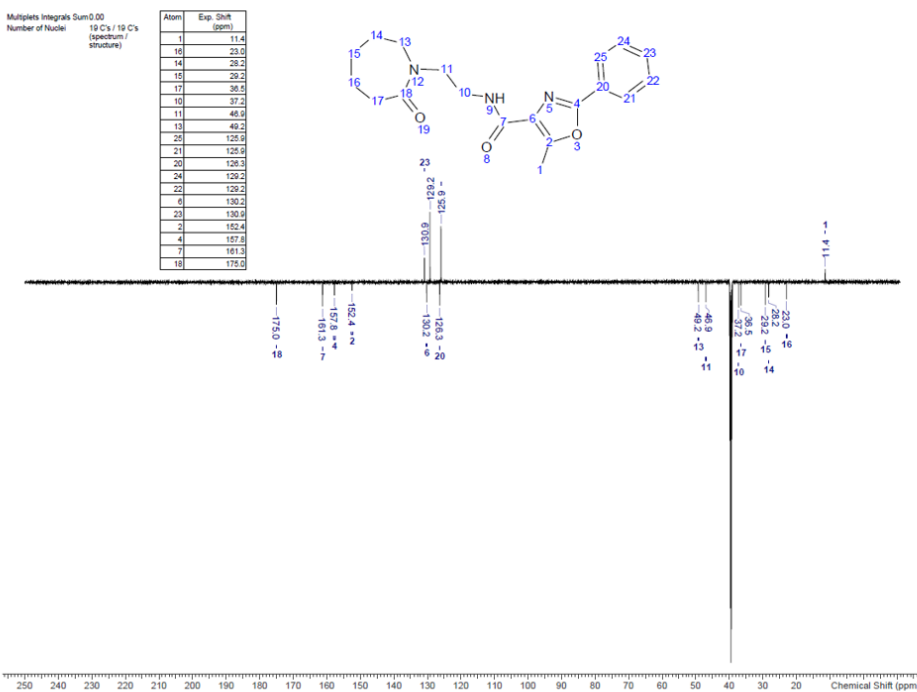

mzw56892 67429  
ST/2459146

Acquisition Time (sec) 0.8323  
Date 11 Mar 2015  
12:44:49  
Nucleus 13C  
Frequency (MHz) 150.8209  
Number of Transients 4096  
Origin spect  
Original Points Count 32768  
Points Count 32768  
Pulse Sequence jmod  
Receiver Gain 6200.00  
Solvent DMSO-d6  
Spectrum Offset (Hz) 18238.8396  
Sweep Width (Hz) 26366.88  
Temperature (degree C) 24.905

<sup>13</sup>C NMR (DMSO-d<sub>6</sub>, 151MHz): δ (ppm) 175.0, 161.3, 157.8, 152.4, 130.9, 130.2, 129.2, 126.3, 125.9, 49.2, 46.9, 37.2, 36.5, 29.2, 28.2, 23.0, 11.4

Analytical Chemistry MDR  
Upper Providence

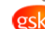

GlaxoSmithKline

Supplemental Data – GSK-5 NMR spectra

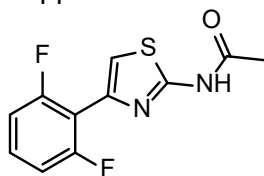

N-[4-(2,6-Difluorophenyl)-1,3-thiazol-2-yl]acetamide  
(Enamine cat # Z384175608).

$^1\text{H}$  NMR (DMSO- $d_6$ , 600 MHz):  $\delta$  (ppm) 12.30 (br s, 1H), 7.45-7.52 (m, 1H), 7.41 (s, 1H), 7.16-7.25 (m, 2H), 2.16 (s, 3H)

$^{13}\text{C}$  NMR (DMSO- $d_6$ , 151 MHz):  $\delta$  (ppm) 168.7, 159.8, 157.6, 136.9, 130.4, 114.7, 112.7, 112.1, 22.5

GSK-5.

Summary table of 1D and 2D NMR data.

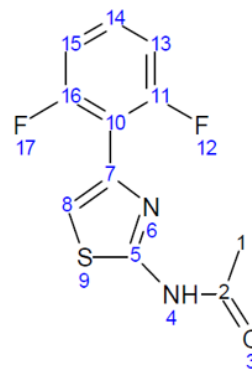

| Atom#  | C Shift | H Shift | H Multiplicity | H Volume | COSY | H HMBC     | C HMBC                 |
|--------|---------|---------|----------------|----------|------|------------|------------------------|
| 1      | 22.475  | 2.162   | s              | 3.000    |      |            | 157.61, 168.71         |
| 13, 15 | 112.065 | 7.206   | m              | 1.517    | 7.48 |            | 159.77                 |
| 10     | 112.749 |         |                |          |      | 7.41       |                        |
| 8      | 114.663 | 7.414   | s              | 0.952    |      |            | 157.61, 136.92, 112.75 |
| 14     | 130.364 | 7.478   | m              | 1.114    | 7.21 |            | 159.77                 |
| 7      | 136.916 |         |                |          |      | 7.41       |                        |
| 5      | 157.609 |         |                |          |      | 2.16, 7.41 |                        |
| 11, 16 | 159.773 |         |                |          |      | 7.21, 7.48 |                        |
| 2      | 168.708 |         |                |          |      | 2.16       |                        |
| 4      |         | 12.300  | br s           | 1.010    |      |            |                        |

# Supplemental Data – GSK-5 NMR spectra

## <sup>1</sup>H NMR spectrum for GSK-5

Multiplets Integrals Sum 8.20  
Number of Nuclei 8 H's / 8 H's  
(spectrum / structure)

mzw56892 67427  
ST/2459145

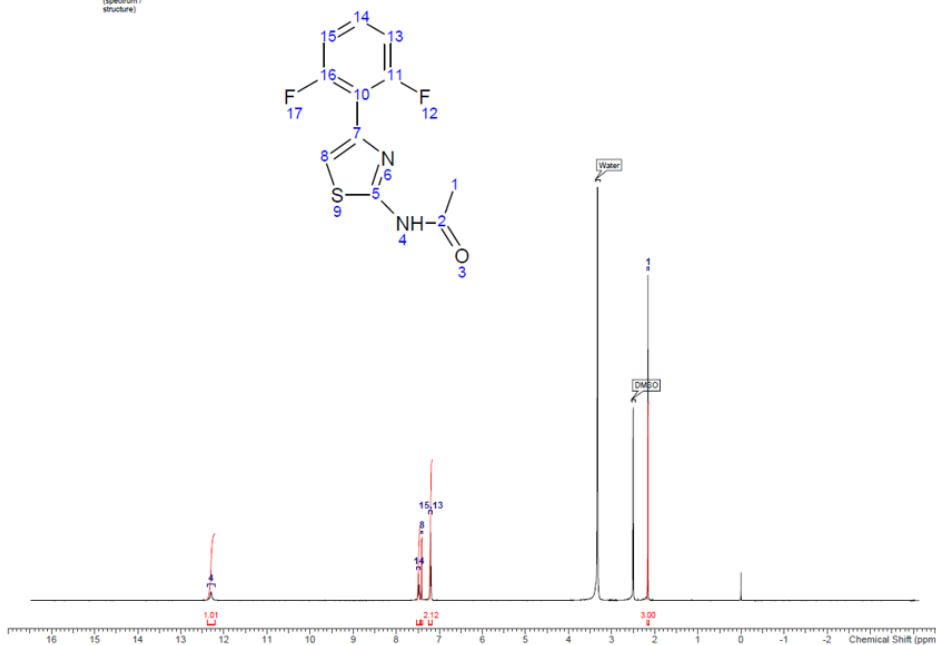

Acquisition Time (sec) 2.8477  
Date 14 Mar 2015 19:37:31  
Nucleus 1H  
Frequency (MHz) 600.1300  
Number of Transients 16  
Origin spect  
Original Points Count 32768  
Points Count 32768  
Pulse Sequence zg30  
Receiver Gain 161.00  
Solvent DMSO-d6  
Spectrum Offset (Hz) 3702.3232  
Sweep Width (Hz) 12375.60  
Temperature (degree C) 25.088

<sup>1</sup>H NMR (DMSO-d<sub>6</sub>, 600MHz): δ (ppm) 12.30 (br s, 1H), 7.45-7.52 (m, 1H), 7.41 (s, 1H), 7.16-7.25 (m, 2H), 2.16 (s, 3H)

date created: 16 03 2015  
Analytical Chemistry MDR  
Upper Providence  
gsk  
GlaxoSmithKline

## <sup>13</sup>C NMR spectrum for GSK-5

Multiplets Integrals Sum 0.60  
Number of Nuclei 11 C's / 11 C's  
(spectrum / structure)

mzw56892 67427  
ST/2459145

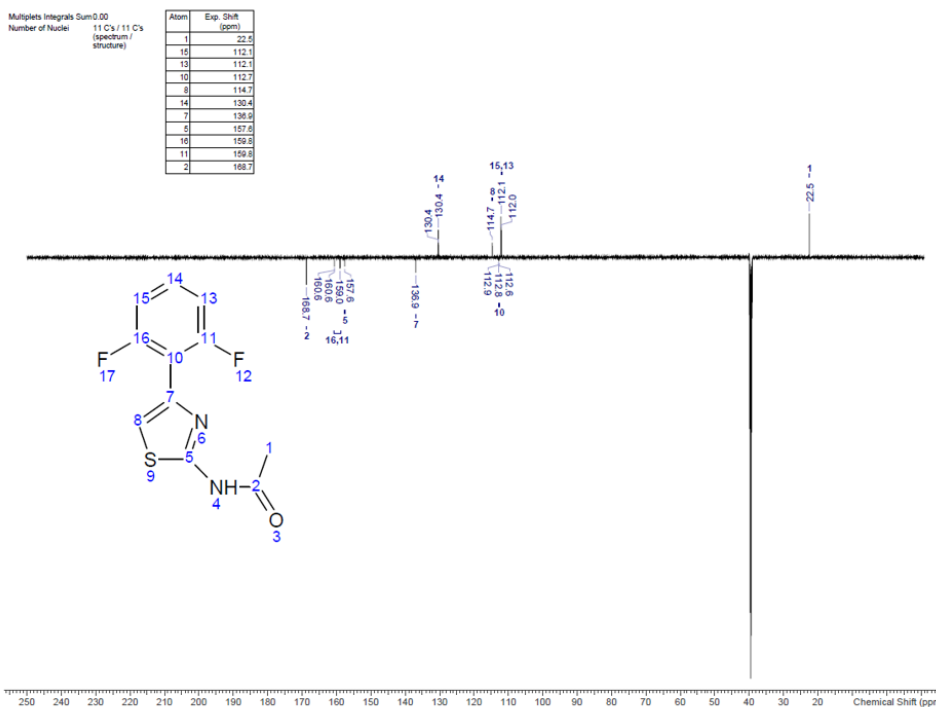

Acquisition Time (sec) 0.8323  
Date 15 Mar 2015 03:38:00  
Nucleus 13C  
Frequency (MHz) 150.9029  
Number of Transients 4096  
Origin spect  
Original Points Count 32768  
Points Count 32768  
Pulse Sequence jmod  
Receiver Gain 5790.00  
Solvent DMSO-d6  
Spectrum Offset (Hz) 18038.8398  
Sweep Width (Hz) 39268.88  
Temperature (degree C) 24.995

<sup>13</sup>C NMR (DMSO-d<sub>6</sub>, 151MHz): δ (ppm) 168.7, 159.8, 157.6, 136.9, 130.4, 114.7, 112.7, 112.1, 22.5

Analytical Chemistry MDR  
Upper Providence  
gsk  
GlaxoSmithKline

Supplemental Data – GSK-6 NMR spectra

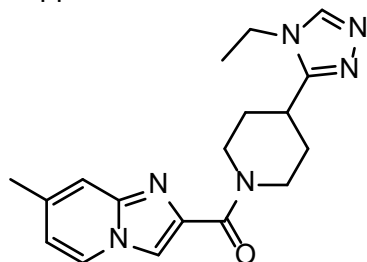

[4-(4-Ethyl-4H-1,2,4-triazol-3-yl)-1-piperidinyl]-(7-methylimidazo[1,2-a]pyridin-2-yl)methanone (Enamine Z1082942462).

<sup>1</sup>H NMR (DMSO-d<sub>6</sub>, 600 MHz): δ (ppm) 8.45 (d, *J*=7.0 Hz, 1H), 8.43 (s, 1H), 8.23 (s, 1H), 7.38 (s, 1H), 6.82 (dd, *J*=1.1, 7.0 Hz, 1H), 5.14 (br s, 1H), 4.55 (br s, 1H), 4.02 (q, *J*=7.2 Hz, 2H), 3.37 (br s, 1H), 3.20 - 3.14 (m, 1H), 3.00 (br s, 1H), 2.36 (s, 3H), 1.93 (br s, 1H), 1.93 (br s, 1H), 1.74 (br s, 1H), 1.74 (br s, 1H), 1.35 (t, *J*=7.3 Hz, 3H)

<sup>13</sup>C NMR (DMSO-d<sub>6</sub>, 151 MHz): δ (ppm) 162.48, 155.55, 143.62, 143.10, 140.09, 136.34, 126.33, 115.94, 115.55, 115.44, 45.73, 41.75, 38.24, 31.25, 31.02, 30.46, 20.78, 15.99

GSK-6.

Summary table of 1D and 2D NMR data.

| Atom (#) | <sup>13</sup> C shift (ppm) | X Shift (ppm) | <sup>1</sup> H shift (ppm) | Atom (label) | ROESY or NOESY (to or from H) | HMBC (from H)  | HMBC (to C) | XHMBC (to X) |
|----------|-----------------------------|---------------|----------------------------|--------------|-------------------------------|----------------|-------------|--------------|
| 2        | 162.5                       |               |                            |              |                               |                |             |              |
| 4        | 45.7                        |               | 5.14                       | ''           | 6, 4, 6                       |                |             |              |
| 4        | 45.7                        |               | 3.36                       | '            | 6, 6, 4                       |                |             |              |
| 5        | 31.3                        |               | 1.75                       | '            |                               |                |             |              |
| 5        | 31.3                        |               | 1.92                       | ''           | 8                             |                |             |              |
| 6        | 41.8                        |               | 4.55                       | ''           | 6, 4, 4                       |                |             |              |
| 6        | 41.8                        |               | 3.01                       | '            | 4, 6, 4                       |                |             |              |
| 7        | 30.5                        |               | 1.74                       | '            | 7                             |                |             |              |
| 7        | 30.5                        |               | 1.94                       | ''           | 7, 8                          |                |             |              |
| 8        | 31.0                        |               | 3.17                       | ''           | 5, 7, 14                      |                | 9           | 10           |
| 9        | 155.6                       |               |                            |              |                               | 8, 14, 12      |             |              |
| 10       |                             | 313.7         |                            |              |                               | 8, 12          |             |              |
| 11       |                             | 315.7         |                            |              |                               | 12             |             |              |
| 12       | 143.1                       |               | 8.44                       |              | 14                            | 14             | 9           | 13, 10, 11   |
| 13       |                             | 174.8         |                            |              |                               | 15, 14, 12     |             |              |
| 14       | 38.2                        |               | 4.02                       |              | 8, 12                         | 15             | 15, 12, 9   | 13           |
| 15       | 16.0                        |               | 1.35                       |              |                               | 14             | 14          | 13           |
| 16       | 140.1                       |               |                            |              |                               | 17             |             |              |
| 17       | 115.9                       |               | 8.23                       |              | 19                            |                | 16, 24      | 18           |
| 18       |                             | 168.8         |                            |              |                               | 20, 23, 17, 19 |             |              |
| 19       | 126.3                       |               | 8.45                       |              | 20, 17                        | 20             | 20, 21, 24  | 18           |
| 20       | 115.6                       |               | 6.82                       |              | 22, 19                        | 23, 19, 23     | 22, 23, 19  | 18           |
| 21       | 136.3                       |               |                            |              |                               | 22, 19         |             |              |
| 22       | 20.8                        |               | 2.36                       |              | 20, 23                        | 20, 23         | 23, 21      |              |
| 23       | 115.4                       |               | 7.38                       |              | 22                            | 22, 20, 20     | 22, 20, 24  | 18           |
| 24       | 143.6                       |               |                            |              |                               | 23, 17, 19     |             |              |

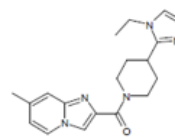

Structure Diagram

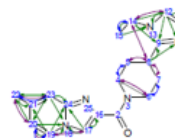

Key: Correlation Arrows (if present): green: HMBC, blue: COSY, purple: ROESY/NOESY, red: check in spectra.

Atom # / NMR Correlations

# Supplemental Data – GSK-6 NMR spectra

## <sup>1</sup>H NMR spectrum for GSK-6

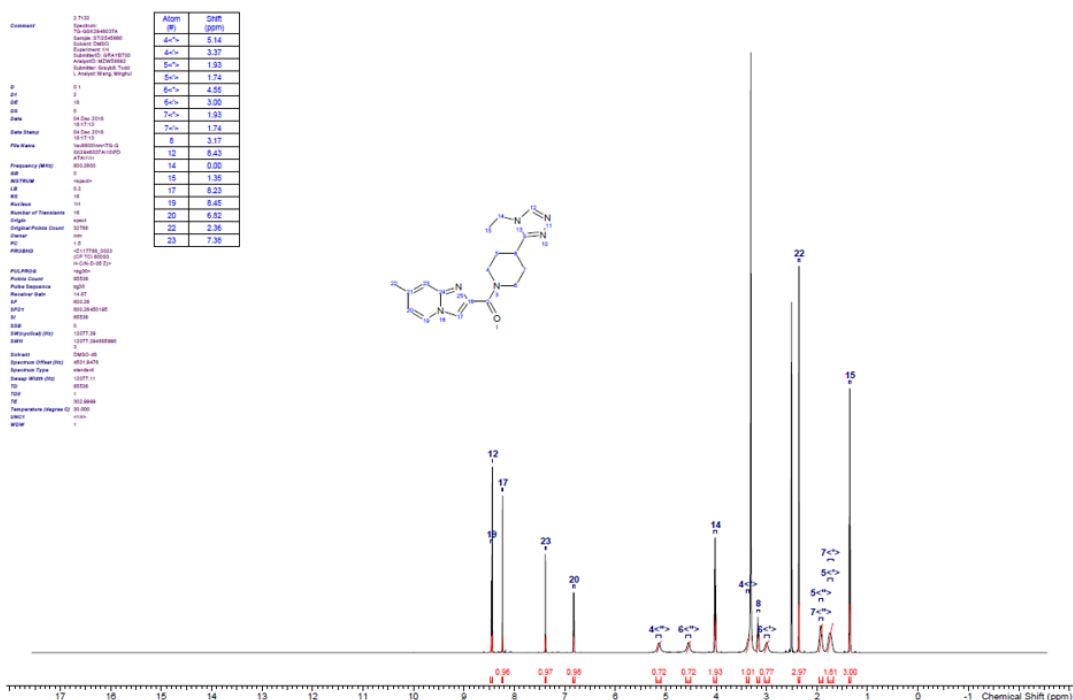

## <sup>13</sup>C NMR spectrum for GSK-6

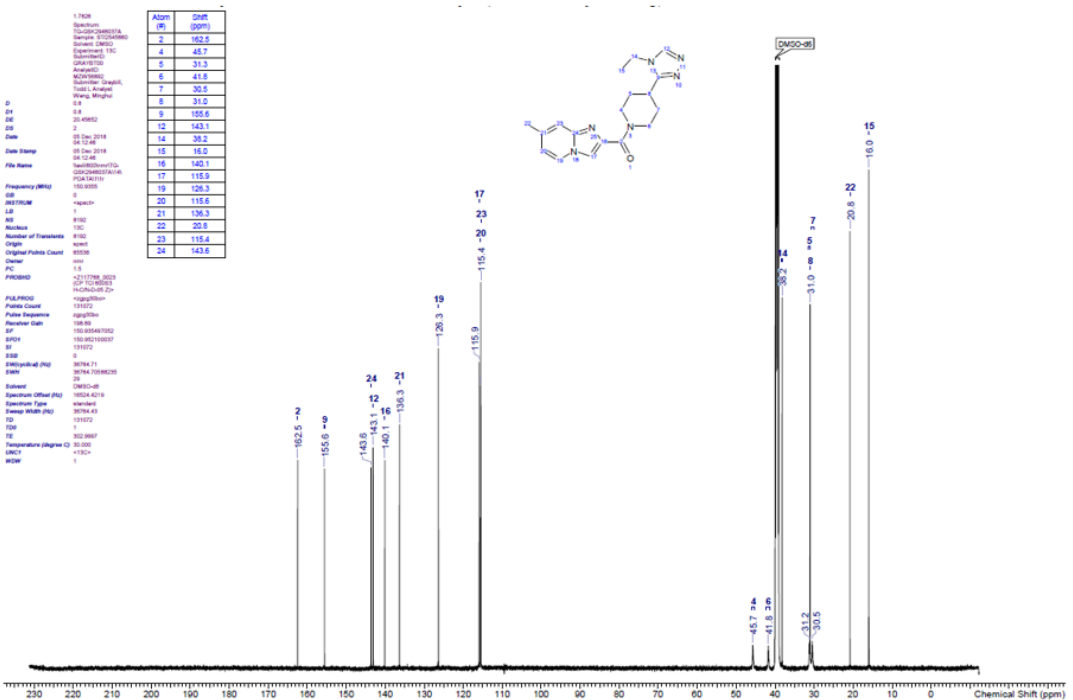

Supplement: NIHMS1580333-supplement-Supp_Info.pdf [file NIHMS1580333-supplement-Supp_Info.pdf]
